# Supplementary material for: Micronutrient intake status and associated factors among children aged 6–23 months in the emerging regions of Ethiopia: A multilevel analysis of the 2016 Ethiopia demographic and health survey
Source: PubMed Central journal article supplement (PMC8535338; doi:10.1371/journal.pone.0258954), 2021-10-22
Supplement: pone.0258954.s002.pdf [file pone.0258954.s002.pdf]

# PLOS ONE

## Micronutrient intake status and associated factors among children aged 6-23 months in the emerging regions of Ethiopia: a multilevel analysis of the 2016 Ethiopian demographic and health survey

--Manuscript Draft--

|                               |                                                                                                                                                                                                                                                                                                                                                                                                                                                                                                                                                                                                                                                                                                                                                                                                                                                                                                                                                                                                                                                                                                                                                                                                                                                                                                                                                                                                                                                                                                                                                                                                                                                                                                                                                                                                                                                                                                                                                                                                                                                                                                                                     |
|-------------------------------|-------------------------------------------------------------------------------------------------------------------------------------------------------------------------------------------------------------------------------------------------------------------------------------------------------------------------------------------------------------------------------------------------------------------------------------------------------------------------------------------------------------------------------------------------------------------------------------------------------------------------------------------------------------------------------------------------------------------------------------------------------------------------------------------------------------------------------------------------------------------------------------------------------------------------------------------------------------------------------------------------------------------------------------------------------------------------------------------------------------------------------------------------------------------------------------------------------------------------------------------------------------------------------------------------------------------------------------------------------------------------------------------------------------------------------------------------------------------------------------------------------------------------------------------------------------------------------------------------------------------------------------------------------------------------------------------------------------------------------------------------------------------------------------------------------------------------------------------------------------------------------------------------------------------------------------------------------------------------------------------------------------------------------------------------------------------------------------------------------------------------------------|
| <b>Manuscript Number:</b>     | PONE-D-20-13718R2                                                                                                                                                                                                                                                                                                                                                                                                                                                                                                                                                                                                                                                                                                                                                                                                                                                                                                                                                                                                                                                                                                                                                                                                                                                                                                                                                                                                                                                                                                                                                                                                                                                                                                                                                                                                                                                                                                                                                                                                                                                                                                                   |
| <b>Article Type:</b>          | Research Article                                                                                                                                                                                                                                                                                                                                                                                                                                                                                                                                                                                                                                                                                                                                                                                                                                                                                                                                                                                                                                                                                                                                                                                                                                                                                                                                                                                                                                                                                                                                                                                                                                                                                                                                                                                                                                                                                                                                                                                                                                                                                                                    |
| <b>Full Title:</b>            | Micronutrient intake status and associated factors among children aged 6-23 months in the emerging regions of Ethiopia: a multilevel analysis of the 2016 Ethiopian demographic and health survey                                                                                                                                                                                                                                                                                                                                                                                                                                                                                                                                                                                                                                                                                                                                                                                                                                                                                                                                                                                                                                                                                                                                                                                                                                                                                                                                                                                                                                                                                                                                                                                                                                                                                                                                                                                                                                                                                                                                   |
| <b>Short Title:</b>           | Micronutrient intake status and its associated factors among children aged 6-23 months                                                                                                                                                                                                                                                                                                                                                                                                                                                                                                                                                                                                                                                                                                                                                                                                                                                                                                                                                                                                                                                                                                                                                                                                                                                                                                                                                                                                                                                                                                                                                                                                                                                                                                                                                                                                                                                                                                                                                                                                                                              |
| <b>Corresponding Author:</b>  | Tsegaye Gebremedhin<br>University of Gondar<br>Gondar, Amara ETHIOPIA                                                                                                                                                                                                                                                                                                                                                                                                                                                                                                                                                                                                                                                                                                                                                                                                                                                                                                                                                                                                                                                                                                                                                                                                                                                                                                                                                                                                                                                                                                                                                                                                                                                                                                                                                                                                                                                                                                                                                                                                                                                               |
| <b>Keywords:</b>              | Micronutrient intake; vitamins and minerals; Children; emerging regions; multilevel mixed-effect regression; Ethiopia                                                                                                                                                                                                                                                                                                                                                                                                                                                                                                                                                                                                                                                                                                                                                                                                                                                                                                                                                                                                                                                                                                                                                                                                                                                                                                                                                                                                                                                                                                                                                                                                                                                                                                                                                                                                                                                                                                                                                                                                               |
| <b>Abstract:</b>              | <p><b>Background:</b> Micronutrient deficiency is recognized as a major public health problem in developing countries, including Ethiopia. The scarcity of micronutrients, particularly in pastoral communities of Ethiopia, might be severe due to poor health care access, drought and poverty. However, empirical evidence is scarce in Ethiopia. Therefore, this study aimed to assess the micronutrient intake status of children aged 6 to 23 months in the emerging regions of Ethiopia.</p> <p><b>Methods:</b> Data from the 2016 Ethiopia Demographic and Health Survey (EDHS) were used. A two-stage stratified sampling technique was employed to identify 1009 children aged 6 to 23 months. A multilevel mixed-effect logistic regression analysis was used to identify individual and community-level factors associated with micronutrient intake status. In the final model, variables with a p-value of &lt; 0.05 and adjusted odds ratio (AOR) with 95% confidence interval (CI) were used to identify factors statistically associated with micronutrient intake status.</p> <p><b>Results:</b> Overall, 62.7% (95% CI: 59.7-65.7) of children aged 6 to 23 months had received at least one of the recommended micronutrients. Antenatal care (ANC) visit (AOR: 1.95, 95% CI: 1.37-2.77), work in the agriculture (AOR: 2.22, 95% CI: 1.30-3.80) and children aged 13 to 23 months (AOR: 1.72, 95% CI: 1.25-2.36) were the individual-level factors, whereas rural residence (AOR: 0.37, 95% CI: 0.14-0.88), reside in Benishangul (AOR: 2.25, 95% CI: 1.29-4.93) and Gambella regions (AOR: 1.87, 95% CI: 1.03-3.38) were the community-level factors associated with micronutrient intake status.</p> <p><b>Conclusions:</b> The micronutrient intake status in the study area was low compared to the national recommendation. Promoting vitamin A and iron-rich foods and micronutrient powders at individual and community-level and strengthen supplementations and deworming alongside the community-based maternal and child health services would improve the micronutrient intake among children.</p> |
| <b>Order of Authors:</b>      | Tsegaye Gebremedhin<br>Andualem Yalew Aschalew<br>Chalie Tadie<br>Endalkachew Dellie<br>Asmamaw Atnafu                                                                                                                                                                                                                                                                                                                                                                                                                                                                                                                                                                                                                                                                                                                                                                                                                                                                                                                                                                                                                                                                                                                                                                                                                                                                                                                                                                                                                                                                                                                                                                                                                                                                                                                                                                                                                                                                                                                                                                                                                              |
| <b>Response to Reviewers:</b> | Response to reviewers'<br>To: PLOS ONE Journal Editorial Office<br>Manuscript title: "Micronutrient intake status and associated factors among children aged 6-23 months in the emerging regions of Ethiopia: a multilevel analysis of the 2016 Ethiopian demographic and health survey" [Manuscript ID: PONE-D-20-13718].                                                                                                                                                                                                                                                                                                                                                                                                                                                                                                                                                                                                                                                                                                                                                                                                                                                                                                                                                                                                                                                                                                                                                                                                                                                                                                                                                                                                                                                                                                                                                                                                                                                                                                                                                                                                          |

Subject: Submission of a revised manuscript for publication

Dear Editor,

Greetings!

We appreciate and acknowledge the academic editor and reviewers for investing their time and energy to review and make comments on our manuscript once again. It is with great pleasure to receive the invaluable and constructive comments for our manuscript.

We accepted and tried to incorporate all of the comments provided. Moreover, the manuscript has been revised by English language expert and grammar and spellings have been improved throughout the manuscript. Thus, the comments are attached here below with their point-by-point responses. In addition, the detailed changes made are highlighted in the "revised manuscript with track changes" to easily identify the changes/improvements and also the clean copy of the revised manuscript is prepared. Finally, we kindly request you to review our revised manuscript.

#### RESPONSE TO EDITOR'S COMMENTS

Academic editor (Mary Hamer Hodges, MBBS MRCP DSc)

#1. I should double check that you are entitled to provide the dataset as supporting information file by contacting Measure DHS.

Authors' response: Dear editor, thank you for your important comment. We have double checked the authorization letter, and unfortunately, we were prohibited to share the data set, "The data must not be passed on to other researchers without the written consent of DHS". So, we would like to say sorry for the previous data set attachment as a supplementary information and we have removed the data set from the manuscript tracking system. Finally, we kindly request the journal office to remove the data set from the public repository if it's deposited.

#### Response to Reviewers

Reviewer #1 (Anni-Maria Pulkki-Brannstrom):

1. I am surprised that a data file is provided as supporting information because as the authors correctly report, the data can be very easily accessed through contacting Measure DHS. I would recommend the authors double check that they are entitled to provide the dataset as supporting information file.

Authors' response: Dear reviewer, we are very much thankful for your critical insights. We have checked the authorization letter; unfortunately, we were prohibited to share the data set, "The data must not be passed on to other researchers without the written consent of DHS". So, we have removed the data from the supporting information and we hope you will definitely understand for the mistaken done in our previous submission regarding to the data file. Finally, we kindly request the journal editorial office to remove the data set from the supplementary files.

2. References to "received the recommended micronutrients" can be misunderstood to mean adequate intake. Please consistently refer to "received at least one of the recommended micronutrients" to ensure no reader is misled about your outcome variable. For example: in the results section of the Abstract, in the column heading in Table 6, and the first sentence of the discussion.

Authors' response: Dear reviewer, thank you for your comment. We have amended the term of outcome variable "received the recommended micronutrients" in to "received at least one of the recommended micronutrients" in the results section of the Abstract, in the column heading in Table 6, and the first sentence of the discussion. Kindly see the clean version of the revised manuscript on page 2 lines 24-25, Table 6 column heading on page 20 and in the discussion page 23 lines 322-323.

3. Regarding the exclusion criteria, please rephrase "index to birth history" in Figure 1 and on row 120, because the meaning is difficult to understand.

Authors' response: Dear reviewer, thank you so much for your comments. We have addressed the issue as per the comments, kindly see the clean version of the revised manuscript on page 7, lines 119-120.

Reviewer #2:

1. In the results section you stated children born of mothers who had ANC visits for

|                                                                                                                                                                                                                                                                                                                                                                                                                                                                                                     |                                                                                                                                                                                                                                                                                                                                                                                                                                                                                                                                                                                                                                                                                                                                                                                                                                                                                                                                                                                                                                                                                                                                                                                                                                                                                                                                                                                                                                                                                                                                                                                                                                                                                                                                                                                                                                                                                      |
|-----------------------------------------------------------------------------------------------------------------------------------------------------------------------------------------------------------------------------------------------------------------------------------------------------------------------------------------------------------------------------------------------------------------------------------------------------------------------------------------------------|--------------------------------------------------------------------------------------------------------------------------------------------------------------------------------------------------------------------------------------------------------------------------------------------------------------------------------------------------------------------------------------------------------------------------------------------------------------------------------------------------------------------------------------------------------------------------------------------------------------------------------------------------------------------------------------------------------------------------------------------------------------------------------------------------------------------------------------------------------------------------------------------------------------------------------------------------------------------------------------------------------------------------------------------------------------------------------------------------------------------------------------------------------------------------------------------------------------------------------------------------------------------------------------------------------------------------------------------------------------------------------------------------------------------------------------------------------------------------------------------------------------------------------------------------------------------------------------------------------------------------------------------------------------------------------------------------------------------------------------------------------------------------------------------------------------------------------------------------------------------------------------|
|                                                                                                                                                                                                                                                                                                                                                                                                                                                                                                     | <p>their recent pregnancy were 1.95 times more likely to receive micronutrients. This may be related to knowledge gained from health talks during ANC visits. It would be prudent to proffer reasons for these differences.</p> <p>Authors' response: Dear reviewer, thank you very much for your comment. We have mentioned that information and knowledge gained from health talks during ANC visits could be the possible explanations of micronutrient intake status difference. Kindly see the clean version of the revised manuscript on page 25, lines 373-376.</p> <p>2. Also proffer reasons in the discussion section for why more mother tend to do complementary feeding for children ages 13-23 compared to 6-12months.</p> <p>Authors' response: Dear reviewer, thank you for your comments; we have included the possible explanation. We tried to discuss the difference in feeding practice by stating the contributor factors of low feeding among children 6-12 months. Please see the clean version of the revised manuscript on page 24, lines 363-366.</p> <p>3. I think it would be worth knowing why more mother preferred to give birth at compared to health facility. Is this because of distance to health facility, costs or they trust the traditional birth attendance more than they do health workers?</p> <p>Authors' response: Dear reviewer, thank you very much for your insight. A plenty of studies identified that distance to health facility, mothers' low awareness about institutional delivery and others cultural and social factors were the high contributor for having a significant number of home delivery in Ethiopia. These factors were contributed not only for low institutional delivery services utilization and or coverage, but also for other maternal and neonatal health services uptake like postnatal services.</p> |
| <b>Additional Information:</b>                                                                                                                                                                                                                                                                                                                                                                                                                                                                      |                                                                                                                                                                                                                                                                                                                                                                                                                                                                                                                                                                                                                                                                                                                                                                                                                                                                                                                                                                                                                                                                                                                                                                                                                                                                                                                                                                                                                                                                                                                                                                                                                                                                                                                                                                                                                                                                                      |
| <b>Question</b>                                                                                                                                                                                                                                                                                                                                                                                                                                                                                     | <b>Response</b>                                                                                                                                                                                                                                                                                                                                                                                                                                                                                                                                                                                                                                                                                                                                                                                                                                                                                                                                                                                                                                                                                                                                                                                                                                                                                                                                                                                                                                                                                                                                                                                                                                                                                                                                                                                                                                                                      |
| <p><b>Financial Disclosure</b></p> <p>Enter a financial disclosure statement that describes the sources of funding for the work included in this submission. Review the <a href="#">submission guidelines</a> for detailed requirements. View published research articles from <a href="#">PLOS ONE</a> for specific examples.</p> <p>This statement is required for submission and <b>will appear in the published article</b> if the submission is accepted. Please make sure it is accurate.</p> | <p>The author(s) received no specific funding for this work.</p>                                                                                                                                                                                                                                                                                                                                                                                                                                                                                                                                                                                                                                                                                                                                                                                                                                                                                                                                                                                                                                                                                                                                                                                                                                                                                                                                                                                                                                                                                                                                                                                                                                                                                                                                                                                                                     |

**Unfunded studies**

Enter: *The author(s) received no specific funding for this work.*

**Funded studies**

Enter a statement with the following details:

- Initials of the authors who received each award
- Grant numbers awarded to each author
- The full name of each funder
- URL of each funder website
- Did the sponsors or funders play any role in the study design, data collection and analysis, decision to publish, or preparation of the manuscript?
- **NO** - Include this sentence at the end of your statement: *The funders had no role in study design, data collection and analysis, decision to publish, or preparation of the manuscript.*
- **YES** - Specify the role(s) played.

\* typeset

**Competing Interests**

Use the instructions below to enter a competing interest statement for this submission. On behalf of all authors, disclose any [competing interests](#) that could be perceived to bias this work—acknowledging all financial support and any other relevant financial or non-financial competing interests.

This statement **will appear in the published article** if the submission is accepted. Please make sure it is accurate. View published research articles from [PLOS ONE](#) for specific examples.

The authors have declared that no competing interests exist.

**NO authors have competing interests**

Enter: *The authors have declared that no competing interests exist.*

**Authors with competing interests**

Enter competing interest details beginning with this statement:

*I have read the journal's policy and the authors of this manuscript have the following competing interests: [insert competing interests here]*

\* typeset

**Ethics Statement**

Enter an ethics statement for this submission. This statement is required if the study involved:

- Human participants
- Human specimens or tissue
- Vertebrate animals or cephalopods
- Vertebrate embryos or tissues
- Field research

Write "N/A" if the submission does not require an ethics statement.

General guidance is provided below. Consult the [submission guidelines](#) for detailed instructions. **Make sure that all information entered here is included in the Methods section of the manuscript.**

The ethical approval and permission to access the data were obtained from the MEASURE DHS (available from <https://www.dhsprogram.com/Data/> and accessed on April 06, 2020) after a brief study concept was submitted.

**Format for specific study types**

**Human Subject Research (involving human participants and/or tissue)**

- Give the name of the institutional review board or ethics committee that approved the study
- Include the approval number and/or a statement indicating approval of this research
- Indicate the form of consent obtained (written/oral) or the reason that consent was not obtained (e.g. the data were analyzed anonymously)

**Animal Research (involving vertebrate animals, embryos or tissues)**

- Provide the name of the Institutional Animal Care and Use Committee (IACUC) or other relevant ethics board that reviewed the study protocol, and indicate whether they approved this research or granted a formal waiver of ethical approval
- Include an approval number if one was obtained
- If the study involved *non-human primates*, add *additional details* about animal welfare and steps taken to ameliorate suffering
- If anesthesia, euthanasia, or any kind of animal sacrifice is part of the study, include briefly which substances and/or methods were applied

**Field Research**

Include the following details if this study involves the collection of plant, animal, or other materials from a natural setting:

- Field permit number
- Name of the institution or relevant body that granted permission

**Data Availability**

Authors are required to make all data underlying the findings described fully available, without restriction, and from the time of publication. PLOS allows rare exceptions to address legal and ethical concerns. See the [PLOS Data Policy](#) and [FAQ](#) for detailed information.

No - some restrictions will apply

A Data Availability Statement describing where the data can be found is required at submission. Your answers to this question constitute the Data Availability Statement and **will be published in the article**, if accepted.

**Important:** Stating 'data available on request from the author' is not sufficient. If your data are only available upon request, select 'No' for the first question and explain your exceptional situation in the text box.

Do the authors confirm that all data underlying the findings described in their manuscript are fully available without restriction?

**Describe where the data may be found in full sentences. If you are copying our sample text, replace any instances of XXX with the appropriate details.**

- If the data are **held or will be held in a public repository**, include URLs, accession numbers or DOIs. If this information will only be available after acceptance, indicate this by ticking the box below. For example: *All XXX files are available from the XXX database (accession number(s) XXX, XXX).*
- If the data are all contained **within the manuscript and/or Supporting Information files**, enter the following: *All relevant data are within the manuscript and its Supporting Information files.*
- If neither of these applies but you are able to provide **details of access elsewhere**, with or without limitations, please do so. For example:

*Data cannot be shared publicly because of [XXX]. Data are available from the XXX Institutional Data Access / Ethics Committee (contact via XXX) for researchers who meet the criteria for access to confidential data.*

*The data underlying the results presented in the study are available from (include the name of the third party*

All relevant data are within the manuscript. Furthermore, data can be accessed from the MEASURE DHS (available from <https://www.dhsprogram.com/Data/>) after submitting a clear concept.

|                                                                                                                                                                                                                                         |  |
|-----------------------------------------------------------------------------------------------------------------------------------------------------------------------------------------------------------------------------------------|--|
| <p><i>and contact information or URL).</i></p> <ul style="list-style-type: none"><li>• This text is appropriate if the data are owned by a third party and authors do not have permission to share the data.</li></ul> <p>* typeset</p> |  |
| Additional data availability information:                                                                                                                                                                                               |  |



1 **Micronutrient intake status and associated factors among children**  
2 **aged 6-23 months in the emerging regions of Ethiopia: a multilevel**  
3 **analysis of the 2016 Ethiopian demographic and health survey**

4 Tsegaye Gebremedhin\*, Andualem Yalew Aschalew, Charlie Tadie, Endalkachew Dellie, and  
5 Asmamaw Atnafu

6 Department of Health Systems and Policy, Institute of Public Health, College of Medicine and  
7 Health Sciences, University of Gondar, Gondar, Ethiopia

8 **\*Corresponding author**

9 Email: tsegishg27@gmail.com

## 10 Abstract

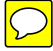

11 **Background:** Micronutrient deficiency is recognized as a major public health problem in  
12 developing countries, including Ethiopia. The scarcity of micronutrients, particularly in  
13 pastoral communities of Ethiopia, might be severe due to poor health care access, drought and  
14 poverty. However, empirical evidence is scarce in Ethiopia. Therefore, this study aimed to  
15 assess the micronutrient intake status of children aged 6 to 23 months in the emerging regions  
16 of Ethiopia.

17 **Methods:** Data from the 2016 Ethiopia Demographic and Health Survey (EDHS) were used.  
18 A two-stage stratified sampling technique was employed to identify 1009 children aged 6 to  
19 23 months. A multilevel mixed-effect logistic regression analysis was used to identify  
20 individual and community-level factors associated with micronutrient intake status. In the final  
21 model, variables with a p-value of  $< 0.05$  and adjusted odds ratio (AOR) with 95% confidence  
22 interval (CI) were used to identify factors statistically associated with micronutrient intake  
23 status.

24 **Results:** Overall, 62.7% (95% CI: 59.7-65.7) of children aged 6 to 23 months had received at  
25 least one of the recommended micronutrients. Antenatal care (ANC) visit (AOR: 1.95, 95%  
26 CI: 1.37-2.77), work in the agriculture (AOR: 2.22, 95% CI: 1.30-3.80) and children aged 13  
27 to 23 months (AOR: 1.72, 95% CI: 1.25-2.36) were the individual-level factors, whereas rural  
28 residence (AOR: 0.37, 95% CI: 0.14-0.88), reside in Benishangul (AOR: 2.25, 95% CI: 1.29-  
29 4.93) and Gambella regions (AOR: 1.87, 95% CI: 1.03-3.38) were the community-level factors  
30 associated with micronutrient intake status.

31 **Conclusions:** The micronutrient intake status in the study area was low compared to the  
32 national recommendation. Promoting vitamin A and iron-rich foods and micronutrient powders  
33 at individual and community-level and strengthen supplementations and deworming alongside

34 the community-based maternal and child health services would improve the micronutrient  
35 intake among children.

## 36 Introduction

37 Micronutrient deficiency is recognized as a global public health problem among children, and  
38 it is worse in low- and middle-income countries, particularly in Ethiopia [1-3].

39 The commonest micronutrients needed for life are iron, zinc, calcium, iodine, and vitamins,  
40 which can be found from foods rich in vitamins and minerals or in the form of supplements,  
41 such as vitamin A supplement [4-6]. Although micronutrients are only needed in small  
42 quantities, their absence from children's diet negatively affects the survival and development  
43 of children. Micronutrient deficiency may lead to devastating consequences, like stunting,  
44 wasting, weakened immunity, and delay in cognitive development [7-11]. Notably,  
45 micronutrient is very critical during the first two years of a child's life; as adequate nutrition  
46 during this period promotes healthy growth and development. Yet, micronutrient deficiency  
47 received less attention than the apparent starvation of people who are unable to get enough  
48 food to survive [12, 13].

49 Furthermore, most infants and young children around the world are not getting the healthy diets  
50 that they need for life and grow well. According to the United Nations Children's Fund  
51 (UNICEF) 2019 report, there were around 340 million children worldwide who suffered from  
52 hidden hunger caused by deficiencies of vitamins and minerals [14]. Globally, a million child  
53 deaths per year due to vitamin A and zinc deficiencies were reported in 2016 [15-17].  
54 Nevertheless, the magnitude of the problem is much higher in low- and middle-income  
55 countries; only 29% of children aged 6–23 months were fed the minimum diversified diet  
56 needed for growth and development [18].

57 Similarly, the deficiency of crucial vitamins and mineral are among the significant public  
58 health problems in Ethiopia. These deficiencies are a result of diets with limited diversity,  
59 minimal bioavailability, frequent meal skipping, limited access to micronutrient-rich 

60 fortified foods, and low vegetable and fruit intake [15, 19, 20]. According to the Ethiopian  
61 Demographic and Health Survey (EDHS) 2016 report, only 14% of the children aged 6–23  
62 months received the minimum dietary diversity [21]. Moreover, studies in different parts of the  
63 country reported only 13 to 43.2% of children aged 6-23 months consumed a diversified diet  
64 [22-26]. The Ethiopian national nutritional supplementation survey (2016) indicated that  
65 vitamin A supplementation coverage in children was 63%, which is lower than the national  
66 target (more than 90%) and vitamin A deficiency was significant (14%) [27].

67 Micronutrient intake is associated with various factors at individual and community levels,  
68 including mothers' sociodemographic and child characteristics, dietary habits, community-  
69 level lifestyle and place of residence [28-30]. On top of the above factors, the use of maternal  
70 healthcare services, such as antenatal care (ANC), institutional delivery and postnatal care  
71 (PNC) visits, are also associated with the micronutrient intake status of children [31, 32].

72 Although there is documented evidence of insufficient micronutrient intake for agrarian  
73 communities and urban dwellers in Ethiopia [22, 24, 25, 33], there is little evidence on  
74 micronutrient intake among children aged 6-23 months in emerging regions of Ethiopia where  
75 pastoralist communities, with poor cultivation of fruits and vegetables, are mainly reside [34].  
76 Additionally, these regions have been identified as the hotspot in the country with high food  
77 insecurity, high child malnutrition rates, and the recurrent onset of droughts [35, 36].

78 Besides, these areas have limited access to health facilities, poor infrastructure and inaccessible  
79 health services that could worsen the micronutrient deficiency [37, 38]. However, studies that  
80 show the individual and community-level factors of micronutrient intake among children are  
81 rare. The objective of this study is, therefore, to assess the micronutrient intake status and  
82 related factors among children aged 6-23 months in emerging regions of Ethiopia by using the  
83 2016 EDHS data. Moreover, the finding could give important insights to develop contextual  
84 strategies for the mitigation of the problem.

## 85 **Materials and Methods**

### 86 **Study settings and data source**

87 The study used the EDHS 2016 data, a nationally representative household survey data  
88 collected every five years. It has been implemented by the Central Statistical Agency (CSA)  
89 [39] with the primary objective of providing up-to-date estimates of key demographic and  
90 health indicators. Administratively, Ethiopia is divided into nine and two geographical regions  
91 and administrative cities, respectively. Of the total regional states, Afar, Somali, Benishangul,  
92 and Gambela are the emerging regions of Ethiopia where pastoralists predominantly live.

### 93 **Sampling procedures**

94 The sampling frame for the 2016 EDHS used the 2007 Ethiopian population and housing  
95 census, which was conducted by the CSA of Ethiopia. The census used a complete list of  
96 84,915 enumeration areas (EAs), which contains the location, type of residence, and the  
97 estimated number of residential households. Then the sample for the 2016 EDHS was stratified  
98 in two stages, and samples of EAs were selected independently from each stratum. The regions  
99 were stratified into urban and rural areas. At each of the lower administrative levels, implicit  
100 stratification and proportional allocation were achieved within each sampling stratum before  
101 sample selection at different levels.

102 In the first stage, 645 EAs were selected with probability proportional to the EA size, and each  
103 sampling stratum was selected from the given samples. The total residential households in the  
104 EA were the EA size, and a household listing operation was implemented. Then, the resulting  
105 lists of households were used as the sampling frame for the selection of households in the  
106 second stage. Some of the selected EAs were large. The selected large EAs with more than 200  
107 households were segmented to minimize the task of household listing. Through the probability

108 proportional to the segment size,  a segment was selected for the survey, and the household  
109 listing was conducted for each selected segment.

110 A fixed number of 28 households from each cluster were selected with an equal probability in  
111 the second stage, a systematic selection from the newly created household listing. The survey  
112 interviewer interviewed only pre-selected households. No replacements or changes of the pre-  
113 selected households were allowed in the implementing stages to prevent bias. In this study, the  
114 2016 EDHS childhood datasets of the four emerging regional states: Afar, Benishangul,  
115 Gambella and Somali, were used for analysis.

116 All women aged 15-49 years who are the usual members of the selected households were  
117 eligible for the female survey. Children aged 6–23 months were the source population and  
118 included 1009 mothers and their children aged 6-23 months were included in the analysis.  
119 Alive, last child and live with their mothers/caregivers were included, while those second and  
120 above child and live with other than their mothers/caregivers were excluded from the analysis  
121 (Fig 1). Additionally, for twins, a mother was asked for a child only. Potential individual and  
122 community level independent variables were also extracted and further analysis was done.

123

124

125 **Fig 1.** Sample study selection of children age 6-23 months in emerging regions, EDHS 2016

126

127

128

129 **Measurements of variables**

130 The dependent variable of the study was micronutrient intake status among children aged 6-23  
131 months, which was determined from the reports of mothers regarding the routine micronutrient  
132 intake of their children. The intake status was measured based on the recommendations of daily  
133 micronutrient intake that meets the micronutrient requirements of almost all healthy individuals  
134 in age and sex-specific population groups [40-43]. The recommended micronutrient for  
135 children are foods rich in vitamin A within 24 hours, foods rich in iron within 24 hours, multiple  
136 micronutrient powder within seven days, iron supplements within seven days, vitamin A  
137 supplements within six months, or deworming medication within six months [41, 42, 44-46].  
138 Accordingly, if the children received at least one of the minimum recommended  
139 micronutrients, we considered as "Yes"; if the children received none of the minimum  
140 recommended micronutrients, it was considered as "No".

141 Foods rich in vitamin A were measured by the consumption of either of the seven food groups  
142 within the preceding 24 hours. These food groups were I. Eggs, ii. Meat (beef, pork, lamb,  
143 chicken), iii. pumpkin, carrots, and squash, iv. any dark green leafy vegetables, v. mangoes,  
144 papayas, and others with vitamin A fruits, vi. Liver, heart, and other organs and vii. Fish or  
145 shellfish.

146 Foods rich in iron were measured by the consumption of either of the four iron-rich food groups  
147 within the past 24 hours. These groups were i. eggs, ii. meat (beef, pork, lamb, chicken), iii.  
148 Liver, heart, and other organs, and iv. Fish or shellfish.

149 Multiple micronutrient powders were assessed by asking the mother whether their child had  
150 received micronutrient powders in the previous seven days. The micronutrients contained a  
151 range of vitamins and minerals (and nearly always include iron, per WHO recommendations)  
152 enclosed in a single-dose sachet added to foods; Sprinkles™ is a brand name used for  
153 micronutrient powders.



154 Iron supplementation was assessed by asking the mothers whether their child had iron  
155 supplementation defined as iron pills, sprinkles with iron, or iron syrup in the previous seven  
156 days.

157 Vitamin A supplementation and deworming medication have been provided for children aged  
158 6-59 months by semi-annually as a national nutrition program. For this study, vitamin A  
159 supplementation and deworming were assessed for those 6 to 23 months of children whether  
160 they received for the last six months or not by reviewing the integrated child card, which  
161 consists of immunization and growth monitoring history.

162 Individual and community-level characteristics were the independent variables. The  
163 individual-level variables were individual sociodemographic and economic characteristics,  
164 obstetric history of the women, and child characteristics. At the same time, the community-  
165 level variables were residence, region, community-level poverty, community-level media  
166 exposure, the distance of the nearest health facility.

167 The wealth quintile was calculated as an index based on consumer goods such as television,  
168 bicycle, or car. Household characteristics were also considered in calculating the wealth index.  
169 These scores were derived using principal component analysis and ranked into poor, middle,  
170 and rich. The wealth quintiles are expressed in terms of quintiles of individuals in the population  
171 rather than quintiles of individuals at risk for anyone's health or population indicator.

172 Distance to the health facility was assessed by the question “distance to the nearest health  
173 facility is a problem?” and the responses were categorized as “big problem” or “not a problem”  
174 [47].

175 Community-level poverty was assessed using the asset index based on data from the entire  
176 country sample on separate scores prepared for rural and urban households, and combined to

177 produce a single asset index for all households as the community level and ranked into five  
178 (poorest, poorer, middle, richer, and richest).

179 Community media exposure was assessed as “yes” if they have access to all three media  
180 (newsletter, radio, and television) at least once a week, otherwise “no” if they did not have any  
181 media exposure.

## 182 **Data processing and statistical analysis**

183 The data were cleaned, re-coded and analysed using STATA (StataCorp, College Station, TX)  
184 version 14. Descriptive statistics were presented using tables and narration to describe the  
185 magnitude of micronutrient intake status by sociodemographic, maternal  and child  
186 characteristics.

187 A multilevel analysis was conducted after checking the eligibility. The model eligibility was  
188 assessed by calculating the Intra-class Correlation Coefficient (ICC) and model with ICC  
189 greater than 10% is eligible for multilevel analysis. In this study, the ICC was 27.3%. Since the  
190 data were hierarchical (individuals were nested within communities), a two-level mixed-effects  
191 logistic regression model was fitted to estimate both the individual and community level  
192 variables (fixed and random) effect on micronutrient intake status, and the log of the probability  
193 of micronutrient intake was modelled using the formula as follows [48]:

$$194 \quad \log \left[ \frac{\pi_{ij}}{1 - \pi_{ij}} \right] = \beta_0 + \beta_1 X_{ij} + \beta_2 Z_{ij} + U_j + e_{ij}$$

195 Where  $i$  is individual level unit and  $j$  is a community-level unit;  $X$  and  $Z$  refer to individual and  
196 community-level variables, respectively;  $\pi_{ij}$  is the probability of micronutrient intake for the  
197  $i^{\text{th}}$  child in the  $j^{\text{th}}$  community; the  $\beta$ 's are the fixed coefficients. Whereas,  $\beta_0$  is the intercept-the  
198 effect on the probability of micronutrient intake in the absence of influence of predictors; and  
199  $u_j$  showed the effect of the community (random effect) on micronutrient intake for the  $j^{\text{th}}$

200 community and  $e_{ij}$  showed random errors at the individual levels. By assuming each community  
201 had different intercept ( $\beta_0 + U_j$ ) and fixed coefficient ( $\beta_{1,2}$ ), the clustered data nature and the  
202 within and between community variations were taken into account.

203 Bivariable and multivariable analysis were computed. First, in the bivariable logistic regression  
204 analysis, a p-value of less than 0.2 was used to fitted three models (models for the individual  
205 level, community level, and both the individual and community level). Then, in the final model  
206 (fixed effect), a p-value less than 0.05 and adjusted odds ratio (AOR) with 95% confidence  
207 interval (CI) were used to estimate the association of individual and community level factors  
208 with micronutrient intake status.

209 The measures of variation (random-effects) were reported using ICC and proportional change  
210 in variance (PCV) to measure the variation between clusters. The ICC refers to the ratio of the  
211 between-cluster variance to the total variance, and it tells us the proportion of the total variance  
212 in the outcome variable that is accounted at the cluster level. The loglikelihood test was used  
213 to estimate the goodness of fit of the adjusted final model in comparison to the preceding  
214 models. A model with the smallest value of loglikelihood is better; accordingly, model three (a  
215 model for both the individual and community level variables) had the lowest value.

## 216 **Ethical considerations**

217 The ethical approval and permission to access the data were obtained from the MEASURE  
218 DHS (available from <https://www.dhsprogram.com/Data/>: accessed on April 06, 2020) after a  
219 brief study concept was submitted.

## 220 **Results**

### 221 **Sociodemographic and economic characteristics of participants**

222 A total of 1009 mothers/caregivers with children aged 6-23 months were included in the final  
223 analysis. The mean age of the mothers was 27.5 (SD  $\pm$  6.3) years, and 83.9% of them were

224 rural dwellers. The majority (72.4%) of the households were in the poor wealth status; the mean  
 225 family size was 5.9 (SD± 2.3). Nearly one-third (34.3%) of the participants were from the  
 226 Somali region and the majority (71.1%) were Muslim by religion. Of the participants, 95.2%  
 227 were married; 59.3% with no education and 66.5% had no work. Similarly, 59.3 and 46.6% of  
 228 their husbands/partners had no education and agricultural workers, respectively (Table 1).

229 Table 1. Sociodemographic and economic characteristics of study participants in emerging  
 230 regions of Ethiopia, 2016 (n=1009).

| Variables                                         | Category            | Frequency (n) | Percent (%) |
|---------------------------------------------------|---------------------|---------------|-------------|
| Age of mothers/caregivers in years                | 15-24               | 341           | 33.8        |
|                                                   | 25-34               | 497           | 49.3        |
|                                                   | >=35                | 171           | 16.9        |
| Residence                                         | Urban               | 163           | 16.1        |
|                                                   | Rural               | 846           | 83.9        |
| Region                                            | Afar                | 254           | 25.2        |
|                                                   | Somali              | 346           | 34.3        |
|                                                   | Benishangul         | 224           | 22.2        |
|                                                   | Gambela             | 185           | 18.3        |
| Religion                                          | Muslim              | 717           | 71.1        |
|                                                   | Protestant          | 173           | 17.1        |
|                                                   | Orthodox            | 85            | 8.4         |
|                                                   | Others*             | 34            | 3.4         |
| Sex of household head                             | Male                | 674           | 66.8        |
|                                                   | Female              | 335           | 33.2        |
| Household wealth status                           | Poor                | 730           | 72.4        |
|                                                   | Middle              | 78            | 7.7         |
|                                                   | Rich                | 201           | 19.9        |
| Current marital status                            | Married             | 961           | 95.2        |
|                                                   | Unmarried           | 48            | 4.8         |
| Educational status of mothers/caregivers          | No education        | 715           | 70.9        |
|                                                   | Primary education   | 199           | 19.7        |
|                                                   | Secondary education | 67            | 6.6         |
|                                                   | Higher              | 28            | 2.8         |
| Educational status of husband's/partner's (n=961) | No education        | 570           | 59.3        |
|                                                   | Primary education   | 197           | 20.5        |
|                                                   | Secondary education | 104           | 10.8        |
|                                                   | Higher              | 90            | 9.4         |

| Variables                              | Category            | Frequency (n) | Percent (%) |
|----------------------------------------|---------------------|---------------|-------------|
| Respondent's occupation                | No work             | 671           | 66.5        |
|                                        | Professional worker | 80            | 7.9         |
|                                        | Agricultural worker | 189           | 18.7        |
|                                        | Others**            | 69            | 6.8         |
| Husband's/partner's occupation (n=961) | No work             | 139           | 14.5        |
|                                        | Professional worker | 175           | 18.2        |
|                                        | Agricultural worker | 448           | 46.6        |
|                                        | Others***           | 199           | 20.7        |

231 \*Catholic, traditional, Joba,

232 \*\*Daily labor, merchant

233 \*\*\*Daily labor, merchant

#### 234 **Obstetric history of participants**

235 The majority (54.5%) of women were in the age group of 18 to 24 years when they gave their  
 236 first birth. Of the total women, 45.2% of them were multipara, and 59.9% have two to five  
 237 living children. Nearly 56% of the women had ANC visits for their recent birth, and out of  
 238 them, 55.9% had first visit. Furthermore, only one-fourth of the women delivered at health  
 239 facilities, and 7.2% of them had PNC checks within two months after delivery (Table 2).

240 Table 2. Obstetric characteristics of participants in the emerging regions of Ethiopia, 2016  
 241 (n=1009).

| Variables                                   | Category        | Frequency (n) | Percent (%) |
|---------------------------------------------|-----------------|---------------|-------------|
| Age of the mother at first birth (in years) | <18             | 402           | 39.8        |
|                                             | 18-24           | 550           | 54.5        |
|                                             | 25+             | 57            | 5.7         |
| Parity                                      | Primipara       | 176           | 17.4        |
|                                             | Multipara       | 456           | 45.2        |
|                                             | Grand multipara | 377           | 37.4        |
| Number of living children                   | 1               | 174           | 17.2        |
|                                             | 2-5             | 604           | 59.9        |

| Variables                                               | Category                      | Frequency (n) | Percent (%) |
|---------------------------------------------------------|-------------------------------|---------------|-------------|
|                                                         | 6+                            | 231           | 22.9        |
| ANC visit                                               | Yes                           | 569           | 56.4        |
|                                                         | No                            | 440           | 43.6        |
| Desire for more children                                | Wants                         | 798           | 79.1        |
|                                                         | Undecided                     | 43            | 4.3         |
|                                                         | Wants no more                 | 168           | 16.6        |
| Place of delivery                                       | Home                          | 745           | 73.8        |
|                                                         | Health facility               | 264           | 26.2        |
| PNC check within two months                             | Yes                           | 73            | 7.2         |
|                                                         | No                            | 936           | 92.8        |
| Timing after postnatal delivery check took place (n=73) | Within 24hrs                  | 7             | 9.6         |
|                                                         | 1-7 <sup>th</sup> day         | 41            | 56.2        |
|                                                         | After the 7 <sup>th</sup> day | 25            | 34.2        |
| Current pregnancy status                                | Pregnant                      | 90            | 8.9         |
|                                                         | Non-pregnant                  | 919           | 91.1        |

242 ANC: Antenatal care, PNC: Postnatal care

### 243 **Child characteristics and common childhood illness**

244 Of the total children, 54.1% were male and 54.2% were in the age group of 13 to 23 months.  
245 Moreover, 42.0% of the children had average birth weight; 55.8% of the children were found  
246 between the second and fifth-order of birth. Approximately 96% of the children were measured  
247 their current weight, and of those, 79.0% were weighted 7-11kgs. Additionally, 15.9, 13.6, and  
248 15.8% of the children had diarrhea, cough, and fever within the last two weeks, respectively  
249 (Table 3).

250 Table 3. Child characteristics and common childhood illness among children aged 6 to 23  
251 months in the emerging regions of Ethiopia, 2016 (n=1009).

| Variables        | Category | Frequency (n) | Percent (%) |
|------------------|----------|---------------|-------------|
| Sex of the child | Male     | 546           | 54.1        |
|                  | Female   | 463           | 45.9        |

|                                            |         |     |      |
|--------------------------------------------|---------|-----|------|
| The current age of the child in months     | 6-12    | 462 | 45.8 |
|                                            | 13-23   | 547 | 54.2 |
| Size of a child at birth                   | Large   | 269 | 26.7 |
|                                            | Average | 424 | 42.0 |
|                                            | Small   | 316 | 31.3 |
| Birth order                                | 1       | 176 | 17.4 |
|                                            | 2-5     | 563 | 55.8 |
|                                            | 6+      | 270 | 26.8 |
| Preceding birth interval in months (n=833) | <=24    | 241 | 28.9 |
|                                            | 25-36   | 282 | 33.8 |
|                                            | 37-48   | 163 | 19.6 |
|                                            | >=49    | 147 | 17.7 |
| Current weight of the child measured       | Yes     | 964 | 95.6 |
|                                            | No      | 45  | 4.4  |
| Current weight of child in kg (n=964)      | <7      | 145 | 15.0 |
|                                            | 7-11    | 762 | 79.0 |
|                                            | 11+     | 57  | 6.0  |
| Had diarrhoea                              | Yes     | 160 | 15.9 |
|                                            | No      | 849 | 84.1 |
| Had cough                                  | Yes     | 137 | 13.6 |
|                                            | No      | 872 | 86.4 |
| Had fever                                  | Yes     | 159 | 15.8 |
|                                            | No      | 850 | 84.2 |

## 252 **Community-level poverty, media exposure and access to a health facility**

253 The analysis showed that 63.1, 16.1, 9.3, 7.3 and 4.2% of the communities are in the poorest,  
 254 poorer, middle, richer and richest status, respectively. Only five percent of the community has  
 255 media exposure. Additionally, 42.0% of the respondents mentioned that access to a health  
 256 facility is not a problem.

## 257 **Micronutrient intake status among children aged 6-23 months**

258 Overall, 62.7% (95% CI: 59.7-65.7) of the children received the minimum recommended  
 259 micronutrients. Of those who took the recommended micronutrient, only 12.9% had received  
 260 three and above micronutrient types.

261 Moreover, 27.8% (95% CI: 25.0-30.5) of the children consumed foods rich in vitamin A at any  
 262 time in 24 hours preceding the interview, and 15.6% (95% CI: 13.3-17.8) of them have

263 consumed foods rich in iron at any time in 24 hours preceding the interview. Additionally,  
 264 7.5% (95% CI: 5.9-9.2) of the children received multiple micronutrient powder in the seven  
 265 days preceding the interview, and 6.0% (95% CI: 4.5-7.4) of them received iron supplements  
 266 in the seven days preceding the interview. Around 47% (95% CI: 44.1-50.3) of the children  
 267 received vitamin A supplements in the six months preceding the interview. Besides, 8.4% (95%  
 268 CI: 5.5-8.7) of the children aged 12 to 23 months of were received deworming medication in  
 269 the six months preceding the interview (Table 4).

270 Table 4. Micronutrient intake status among children aged 6-23 months in the emerging regions  
 271 of Ethiopia, 2016 (n=1009).

| Food groups and supplementations                    | Contains/measurements                              | Received<br>n (%) | No received<br>n (%) |
|-----------------------------------------------------|----------------------------------------------------|-------------------|----------------------|
| Consumed foods rich in vitamin A within 24 hours    | Eggs                                               | 85 (8.4)          | 924 (91.6)           |
|                                                     | Meat (beef, pork, lamb, chicken, etc)              | 52 (5.2)          | 957 (94.8)           |
|                                                     | Pumpkin, carrots, and squash                       | 111 (11.0)        | 898 (89.0)           |
|                                                     | Any dark green leafy vegetables                    | 91 (9.0)          | 918 (91.0)           |
|                                                     | Mangoes, papayas, and others with vitamin A fruits | 133 (13.2)        | 876 (86.8)           |
|                                                     | Liver, heart, and other organs                     | 32 (3.2)          | 977 (96.8)           |
|                                                     | Fish or shellfish.                                 | 45 (4.5)          | 964 (95.5)           |
| <b>Overall vitamin A rich foods consumptions</b>    |                                                    | <b>280 (27.7)</b> | <b>729 (72.3)</b>    |
| Consumed foods rich in iron at any time in 24 hours | Eggs                                               | 85 (8.4)          | 924 (91.6)           |
|                                                     | Meat (beef, pork, lamb, chicken)                   | 52 (5.2)          | 957 (94.8)           |
|                                                     | Liver, heart, and other organs                     | 32 (3.2)          | 977 (96.8)           |
|                                                     | Fish or shellfish.                                 | 45 (4.5)          | 964 (95.5)           |
| <b>Overall iron rich food consumption</b>           |                                                    | <b>157 (15.6)</b> | <b>852 (84.4)</b>    |



|                                                                         |                   |                   |
|-------------------------------------------------------------------------|-------------------|-------------------|
| Multiple micronutrient powder within seven days                         | 76 (7.5)          | 933 (92.5)        |
| Iron supplements within seven days                                      | 60 (6.0)          | 949 (94.0)        |
| Vitamin A supplements within six months                                 | 476 (47.2)        | 533 (52.8)        |
| Deworming medication in the six months (n=547)                          | 46 (8.4)          | 501 (91.6)        |
| <b>Overall, received at least the minimum recommended micronutrient</b> | <b>633 (62.7)</b> | <b>376 (37.3)</b> |

272 **Random effects (measures of variation)**

273 There was a significant variation in the intake of micronutrients among children aged 6 to 23  
274 months across the communities (clusters). The intra-cluster correlation coefficient (ICC) in the  
275 null model (model 0) for micronutrient intake was 0.273. In other words, 27.3% of the variation  
276 in micronutrient intake among children aged 6 to 23 months is due to the differences between  
277 regions/clusters (between-cluster variation) (Table 5).

278 Table 5. Results from a random intercept model (a measure of variation) for micronutrient  
279 intake among children aged 6 to 23 months at cluster level by multilevel logistic regression  
280 analysis, EDHS 2016.

| Measure of variations         | Model 0<br>(null model) | Model 1 | Model 2 | Model 3<br>(full model) |
|-------------------------------|-------------------------|---------|---------|-------------------------|
| Variance                      | 3.35                    | 1.49    | 1.61    | 1.43                    |
| Explained variation (PCV) (%) | Ref.                    | 55      | 52      | 57                      |
| ICC (%)                       | 27.3                    | 62.2    | 73.3    | 79.9                    |
| Model fitness                 |                         |         |         |                         |
| Deviance (-2*log likelihood)  | 1271.9                  | 1154.7  | 1195.0  | 1135.4                  |
| AIC                           | 1275.9                  | 1200.4  | 1214.5  | 1193.8                  |

281 AIC: Akaike's Information Criterion

282 ICC: Intra-class Correlation Coefficient

283 PCV: Proportional Change in Variance

284 Model 0: without independent variables (null model)

285 Model 1: only individual-level variables

286 Model 2: only community-level variables

287 Model 3: individual and community-level variables (full model)

288 **Individual and community-level factors of micronutrient intake status (fixed**  
289 **effects)**

290 In the bivariable analysis, mothers educational status and occupation, sex of household head,  
291 household wealth status, age at first birth, ANC and PNC visits, place of delivery, desire for  
292 more child, age of the child, currently breastfeeding, history of diarrhea and cough within the  
293 last two weeks and current pregnancy status was the individual level candidate variables.  
294 Whereas residence, region, community-level poverty and community level media exposure  
295 were the community level candidate variables.

296 In the final model (model 3), after adjusting for individual and community level factors,  
297 women's occupational status, the current age of the child, antenatal visits for current pregnancy,  
298 residence and region were significantly associated with the micronutrient intake status among  
299 children aged 6 to 23 months.

300 Accordingly, children whose mothers/caregivers with an agricultural occupation were 2.22  
301 times more likely to receive the recommended micronutrient compared to those children whose  
302 mothers/caregivers with no work (AOR: 2.22, 95% CI: 1.30-3.80). Children born from mothers  
303 who had ANC visits for their recent pregnancy were 1.95 times more likely to receive the  
304 recommended micronutrient compared to those who had not ANC visits (AOR: 1.95, 95%  
305 CI:1.37-2.77). Those children aged 13 to 23 months were 1.72 times more likely to receive the  
306 recommended micronutrient compared to those aged 6 to 12 months (AOR: 1.72, 95% CI:  
307 1.25-2.36). Those children who reside in the rural communities were 63% less likely to receive  
308 the recommended micronutrient compared to their counterparts (AOR: 0.37, 95% CI: 0.14-

309 0.88). Children who live in the Benishangul and Gambella region were 2.52 (AOR: 2.52, 95%  
310 CI: 1.29-4.93) and 1.87 (AOR: 1.87, 95% CI: 1.03-3.38) times more likely to take the  
311 recommended micronutrient compared to those children who live in the Afar region,  
312 respectively (Table 6).

313 Table 6. Multilevel logistic regression analysis of factors associated with micronutrient intake status among children aged 6-23 months in the  
 314 emerging regions of Ethiopia, EDHS 2016 (n=1009).

| Variables                               | Received at least one of the recommended micronutrients |             | COR (95% CI)     | Model 0<br>(ICC:<br>27.3%) | Model 1<br>AOR (95% CI) | Model 2<br>AOR (95% CI) | Model 3<br>AOR (95% CI) |
|-----------------------------------------|---------------------------------------------------------|-------------|------------------|----------------------------|-------------------------|-------------------------|-------------------------|
|                                         | Yes<br>n (%)                                            | No<br>n (%) |                  |                            |                         |                         |                         |
| <b>Individual-level characteristics</b> |                                                         |             |                  |                            |                         |                         |                         |
| <b>Mothers educational status</b>       |                                                         |             |                  |                            |                         |                         |                         |
| No education                            | 409 (57.2)                                              | 306 (42.8)  | 1                |                            | 1                       |                         | 1                       |
| Primary                                 | 150 (75.4)                                              | 49 (24.6)   | 1.89 (1.24-2.88) |                            | 1.44 (0.94-2.22)        |                         | 1.19 (0.76-1.87)        |
| Secondary                               | 52 (77.6)                                               | 15 (22.4)   | 2.38 (1.19-4.76) |                            | 1.52 (0.75-3.10)        |                         | 1.20 (0.57-2.54)        |
| Higher                                  | 22 (78.6)                                               | 6 (21.4)    | 2.47 (0.84-7.20) |                            | 1.17 (0.38-3.56)        |                         | 0.83 (0.25-2.75)        |
| <b>Household head</b>                   |                                                         |             |                  |                            |                         |                         |                         |
| Male                                    | 435 (64.5)                                              | 239 (35.5)  | 1                |                            | 1                       |                         | 1                       |
| Female                                  | 198 (59.1)                                              | 137 (40.9)  | 0.77 (0.55-1.07) |                            | 0.81 (0.58-1.12)        |                         | 0.86 (0.61-1.19)        |
| <b>Mothers' occupation</b>              |                                                         |             |                  |                            |                         |                         |                         |
| No work                                 | 371 (55.3)                                              | 300 (44.7)  | 1                |                            | 1                       |                         | 1                       |
| Professional                            | 57 (71.3)                                               | 23 (28.7)   | 1.78 (0.98-3.21) |                            | 1.38 (0.75-2.54)        |                         | 1.38 (0.75-2.55)        |
| Agricultural                            | 154 (81.5)                                              | 35 (18.5)   | 3.34 (2.06-5.43) |                            | 3.04 (1.89-4.88)        |                         | 2.22 (1.30-3.80) *      |
| Others                                  | 51 (73.9)                                               | 18 (26.1)   | 2.03 (1.07-3.86) |                            | 1.51 (0.78-2.93)        |                         | 1.34 (0.68-2.62)        |
| <b>Wealth status</b>                    |                                                         |             |                  |                            |                         |                         |                         |
| Poor                                    | 418 (57.3)                                              | 312 (42.7)  | 1                |                            | 1                       |                         | 1                       |
| Middle                                  | 61 (78.2)                                               | 17 (21.8)   | 2.33 (1.23-4.40) |                            | 1.43 (0.75-2.74)        |                         | 1.17 (0.46-3.00)        |
| Rich                                    | 154 (76.6)                                              | 47 (23.4)   | 2.12 (1.34-3.59) |                            | 1.40 (0.86-2.26)        |                         | 0.54 (0.20-1.47)        |
| <b>Age at first birth in years</b>      |                                                         |             |                  |                            |                         |                         |                         |
| Less than 18                            | 248 (61.7)                                              | 154 (38.3)  | 1                |                            | 1                       |                         | 1                       |
| 18-24                                   | 347 (63.1)                                              | 203 (36.9)  | 1.23 (0.89-1.69) |                            | 1.18 (0.86-1.62)        |                         | 1.18 (0.86-1.63)        |
| 25+                                     | 38 (66.7)                                               | 19 (33.3)   | 1.54 (0.76-3.13) |                            | 1.43 (0.72-2.87)        |                         | 1.40 (0.69-2.86)        |

|                                 |            |            |                  |  |                  |   |                    |
|---------------------------------|------------|------------|------------------|--|------------------|---|--------------------|
| ANC visit                       |            |            |                  |  |                  |   |                    |
| No                              | 214 (48.6) | 226 (51.4) | 1                |  | 1                |   | 1                  |
| Yes                             | 419 (73.6) | 150 (26.3) | 2.78 (2.01-3.84) |  | 2.03 (1.43-2.86) |   | 1.95 (1.37-2.77) * |
| Place of delivery               |            |            |                  |  |                  |   |                    |
| Home                            | 429 (57.6) | 316 (42.4) | 1                |  | 1                |   | 1                  |
| Health facility                 | 204 (77.3) | 60 (22.7)  | 2.39 (1.61-3.54) |  | 1.31 (0.85-2.02) |   | 1.20 (0.77-1.89)   |
| PNC visit                       |            |            |                  |  |                  |   |                    |
| Yes                             | 62 (84.9)  | 11 (15.1)  | 1                |  | 1                |   | 1                  |
| No                              | 571 (61.0) | 365 (39.0) | 0.30 (0.14-0.64) |  | 0.54 (0.25-1.13) |   | 0.54 (0.25-1.17)   |
| Desire more child               |            |            |                  |  |                  |   |                    |
| Wants                           | 478 (59.9) | 320 (40.1) | 1                |  | 1                |   | 1                  |
| Undecided                       | 27 (62.8)  | 16 (37.2)  | 1.24 (0.59-2.59) |  | 1.05 (0.50-2.19) |   | 1.15 (0.55-2.39)   |
| Wants no more                   | 128 (76.2) | 40 (23.8)  | 1.94 (1.24-3.05) |  | 1.87 (1.19-2.94) |   | 1.54 (0.96-2.46)   |
| Child currently breastfeed      |            |            |                  |  |                  |   |                    |
| No                              | 111 (56.1) | 87 (43.9)  | 1                |  | 1                |   | 1                  |
| Yes                             | 522 (64.4) | 289 (35.6) | 1.36 (0.93-1.98) |  | 1.17 (0.76-1.82) |   | 1.15 (0.74-1.80)   |
| Currently pregnant              |            |            |                  |  |                  |   |                    |
| No                              | 585 (63.7) | 334 (36.3) | 1                |  | 1                |   | 1                  |
| Yes                             | 48 (53.3)  | 42 (46.7)  | 0.62 (0.36-1.05) |  | 0.73 (0.40-1.32) |   | 0.79 (0.43-1.44)   |
| Age of child in months          |            |            |                  |  |                  |   |                    |
| 6-12                            | 259 (56.1) | 203 (43.9) | 1                |  | 1                |   | 1                  |
| 13-23                           | 374 (68.4) | 173 (31.6) | 1.74 (1.28-2.35) |  | 1.79 (1.31-2.45) |   | 1.72 (1.25-2.36) * |
| Diarrhoea in the last two weeks |            |            |                  |  |                  |   |                    |
| No                              | 522 (61.5) | 327 (38.5) | 1                |  | 1                |   | 1                  |
| Yes                             | 111 (69.4) | 49 (30.6)  | 1.53 (1.00-2.35) |  | 1.27 (0.81-1.99) |   | 1.28 (0.82-2.00)   |
| Cough in the last two weeks     |            |            |                  |  |                  |   |                    |
| No                              | 558 (64.0) | 314 (36.0) | 1                |  | 1                |   | 1                  |
| Yes                             | 75 (54.7)  | 62 (42.3)  | 0.73 (0.47-1.12) |  | 0.59 (0.38-0.92) |   | 0.65 (0.41-1.02)   |
| Community-level characteristics |            |            |                  |  |                  |   |                    |
| Residence                       |            |            |                  |  |                  |   |                    |
| Urban                           | 126 (77.3) | 37 (22.7)  | 1                |  |                  | 1 | 1                  |

|                                |            |            |                  |  |  |                  |                    |
|--------------------------------|------------|------------|------------------|--|--|------------------|--------------------|
| Rural                          | 507 (60.0) | 339 (40.0) | 0.42 (0.24-0.75) |  |  | 0.42 (0.24-0.72) | 0.35 (0.14-0.88) * |
| Region                         |            |            |                  |  |  |                  |                    |
| Afar                           | 127 (50.0) | 127 (50.0) | 1                |  |  | 1                | 1                  |
| Somali                         | 182 (52.6) | 164 (47.4) | 1.11 (0.69-1.81) |  |  | 1.02 (0.65-1.59) | 1.13 (0.71-1.76)   |
| Benishangul                    | 187 (83.4) | 37 (16.6)  | 6.44 (3.54-11.7) |  |  | 5.27 (2.87-9.66) | 2.52 (1.29-4.93) * |
| Gambella                       | 137 (74.0) | 48 (26.0)  | 3.81 (2.12-6.87) |  |  | 2.87 (1.63-5.04) | 1.87 (1.03-3.38) * |
| Community-level poverty        |            |            |                  |  |  |                  |                    |
| Poorest                        | 350 (55.0) | 287 (45.0) | 1                |  |  | 1                | 1                  |
| Poorer                         | 120 (74.0) | 42 (26.0)  | 1.89 (1.19-3.00) |  |  | 1.20 (0.74-1.94) | 1.07 (0.64-1.77)   |
| Middle                         | 67 (71.3)  | 27 (28.7)  | 1.88 (1.08-3.26) |  |  | 1.15 (0.64-2.04) | 0.78 (0.35-1.73)   |
| Richer                         | 62 (83.8)  | 12 (16.2)  | 3.65 (1.77-7.52) |  |  | 2.04 (0.98-4.26) | 2.34 (0.76-7.13)   |
| Richest                        | 34 (81.0)  | 8 (19.0)   | 3.43 (1.42-8.31) |  |  | 1.95 (0.79-4.80) | 2.59 (0.67-9.93)   |
| Community-level media exposure |            |            |                  |  |  |                  |                    |
| No                             | 593 (61.8) | 366 (38.2) | 1                |  |  | 1                | 1                  |
| Yes                            | 40 (80.0)  | 10 (20.0)  | 1.89 (0.83-4.30) |  |  | 1.03 (0.44-2.36) | 1.07 (0.44-2.61)   |

315 \*Statistically significant at p-value <0.05 at model 3

316 ANC: Antenatal Care,

317 AOR: Adjusted Odds Ratio,

318 COR: Crude Odds Ratio,

319 ICC: Intra-class Correlation Coefficient,

320 PNC: Postnatal Care

## 321 **Discussion**

322 The study showed that at least one of the recommended micronutrient intake among children  
323 aged 6-23 months in the emerging regions of Ethiopia was found to be 62.7%. The individual-  
324 level factors such as the age of the child, mother's occupation, and current ANC follow up have  
325 been significantly associated with the intake of micronutrients. From the community-level  
326 factors, residence and region were significantly associated with micronutrient intake 

327 Micronutrient is available in foods and can also be provided through a direct supplement. In  
328 this study, we assessed the level of vitamin A and iron intake. The result showed that around  
329 28 and 15.6% of children consume foods rich in vitamin A and iron, respectively. From EDHS  
330 2016 report, consumption of foods rich in vitamin A and iron were 38 and 22%,  
331 correspondingly, and lowest intake was observed in Afar [49], which is comparable with the  
332 current finding. Besides, almost half of the children (47.18%) get vitamin A supplements and  
333 as few as 6% of them get iron supplements. The previous EDHS (2011) finding showed that  
334 vitamin A supplement, in the four regions, was 43.17%, which is lower than the current result  
335 [36]. This might be due to the emphasis given by the government to achieve the first phase of  
336 the nutritional program.

337 Moreover, the national micronutrient survey (2016) revealed that the national coverage of  
338 vitamin supplements was 63% [50], which is higher than the current finding. However, the  
339 report showed that sub-clinical vitamin A deficiency was 14%. Vitamin A supplement in  
340 Nigeria was 45% which is comparable with the current finding [51]. However, our study differs  
341 from the finding in India (30.4%) [52].

342 The finding showed that at least one of the recommended micronutrient intake status was  
343 62.7%, which is lower than that of the national target of over 90% [53]. Besides, there was a  
344 considerable difference between the regions. The National Nutritional Program end-line survey

345 report was also comparable with the current findings [54]. Benishangul and Gambella regions  
346 where agriculture, a source of legume and cereal plants, is very common, had a higher intake.  
347 However, regions of Afar and Somalia are inhabited by pastoralist people with a scattered  
348 settlement where fresh fruit and vegetables are not readily available. Besides, healthcare  
349 facilities may also be inaccessible and under-staffed. A study from the pastoral community  
350 showed that the majority source of food was dairy products [55].

351 This study identified that micronutrient intake among children whose mothers worked in  
352 agriculture was higher compared with children whose mothers did not have work. Mothers who  
353 work in agriculture might have better access to diversified agricultural products and animal  
354 products that are rich sources for vitamins and minerals. Moreover, participating in work may  
355 expose mothers with peers and friends that can serve as a source of information related to  
356 micronutrient intake and benefits. This study also showed that agrarian dominants were more  
357 likely to consume diversified food, which can be used as a proxy for adequate micronutrient  
358 density of foods [56]. Previous studies are also consistent with the current finding [36, 57].

359 The odds of micronutrient intake for children age 13-23 were higher compared to children age  
360 between 6-12 months. The possible explanation could be that the age groups have better  
361 nutritional diversity. In the EDHS 2016, for example, children over 12 months old were more  
362 likely to obtain diversified food, which implies that they can get more micronutrients [56, 58].  
363 On the other way, the late introduction of complementary feeding might have resulted in  
364 consuming a limited variety of food such as only milk or cereal products. Moreover, mothers'  
365 perception of low ability of children intestine and traditional beliefs might contribute to low  
366 consumption of diversified food in those children (6-12 months). Also, even if vitamin A  
367 supplement is effective for 6-11 months, especially when used with the vaccine against  
368 measles, vitamin A supplementation can be reduced by dropping out of this age group and



369 certain children (6-12 months) were not eligible to receive vitamin A supplement during the  
370 survey. Studies from Nigeria are also comparable to the current finding [51, 57].

371 In this study, higher odds of micronutrient intake were observed among children whose mother  
372 had ANC follow-ups compared to those children whose mother did not have ANC follow-ups.  
373 This finding was in line with these of previous studies conducted in Ethiopia [36]. The possible  
374 explanation might be mothers who had ANC follow-up may have a chance of getting  
375 information, education, knowledge and also counselling services on foods rich in  
376 micronutrients and its availability from health professionals' talks. Furthermore, they might  
377 able to learn about the value of iron intake that supplements during their ANC follow-up.  
378 Moreover, a systematic review by Temesgen et al. suggests that children whose mothers have  
379 ANC follow-up have a higher probability than their counterparts to eat diversified food [59].

380 The odds of micronutrient intake among children who reside in rural communities were lower  
381 compared to their counterparts. This is supported by a systematic study in Ethiopia, which  
382 reported that urban residents had higher odds of micronutrient intake than rural residents [59].  
383 However, few studies' findings [51, 52, 60] contradict with the current study. The potential  
384 explanation might be food fortification and supplementation focused more on rural than urban  
385 through community-based maternal and child health outreach programs.

386 Our finding shows that micronutrient intake among children who live in Benishangul and  
387 Gambella regions was higher compared to those who live in the Afar region. This can be  
388 explained by the fact that, compared to the two regions, the economic activities of the Afar and  
389 Somalia regions are mostly dominated by cattle breeding and pastoral lifestyles, and agriculture  
390 is common in Benishangul and Gambella. Besides, since the latter two regions have dense  
391 forests and water reservoirs, they could get wild fruit and fish, which are a good source of  
392 micronutrients. Previous studies showed that in the pastoral community, vitamin A rich foods  
393 were scarce, and meat and egg consumption were low [55]. Natural forest and semi-natural

394 forests were positively associated with a larger number of nutritionally important food groups  
395 [61]. A study from the recent EDHS (2016) showed that children of the agrarian community  
396 were more likely to consume diversified food than that of the pastoral community.

### 397 **Strength and limitations of the study**

398 The main strengths of the study are its representativeness, large sample size, and the availability  
399 of individual and community-level factors that demonstrate the actual micronutrient intake  
400 status of children in the emerging regions. Besides, this study used a multilevel-modelling  
401 technique to identify a more valid result that takes the hierarchical nature of the survey data  
402 into account. Furthermore, the DHS surveys have similar designs with similar variables in a  
403 different setting; the result may, therefore, be applied to other similar settings.

404 The study tried to assess the intake status of micronutrient using the national data and discuss  
405 this with other cross-sectional studies; focus on nutritional studies that can under or  
406 overestimates our findings. Moreover, the study used the national micronutrient  
407 recommendation for the assessment of the outcome variable which might not significantly  
408 measure the adequacy of intake. Furthermore, the mothers might have experienced recall bias,  
409 particularly regarding vitamin A supplementation and deworming for their child in the last six  
410 months prior to the survey, for instance. Compared to other studies, however, our study  
411 assessed later events that preceded the study by only six months which might decrease the  
412 recall bias.

### 413 **Conclusions**

414 In conclusion, the overall intake of micronutrients in this study was below the national  
415 recommendation. Besides, there was a lower intake of micronutrients in the two pastorally  
416 dominated regions (Afar and Somalia). Individual-level characteristics such as mothers'

417 occupation and age of a child and community-level characteristics ANC for index child,  
418 residence, and region were significantly associated with the micronutrient intake sta 

419 Therefore, for the improvement of micronutrient intake, the regional and zonal health  
420 departments and the health facilities needs to cooperate with state governments across the  
421 regions, continuously increase the amount of vitamin A and the iron supplementation,  
422 encourage the use of Vitamin A and iron-rich foods, and reinforce community-based outreach  
423 programs for maternal health and child health programs.

## 424 **List of Abbreviations**

425 ANC: Antenatal Care, AOR: Adjusted Odds Ratio, CI: Confidence Interval, COR: Crude Odds  
426 Ratio, CSA: Central Statistical Agency, EA: Enumeration Areas, EDHS: Ethiopian  
427 Demographic and Health Survey, FAO: Food and Agriculture Organizations, FMoH: Federal  
428 Ministry of Health, ICC: Intra-class Correlation Coefficients, MN: Micronutrients, PNC:  
429 Postnatal Care, and WHO: World Health Organization

## 430 **Acknowledgments**

431 We are very thankful to MEASURE DHS for permission to use the EDHS 2016 survey data  
432 sets.

## 433 **Reference**

- 434 1. Von Grebmer K, Saltzman A, Birol E, Wiesman D, Prasai N, Yin S, et al. Synopsis:  
435 2014 Global Hunger Index: The Challenge of Hidden Hunger: Intl Food Policy Res Inst; 2014.
- 436 2. Tzioumis E, Kay MC, Bentley ME, Adair LS. Prevalence and trends in the childhood  
437 dual burden of malnutrition in low-and middle-income countries, 1990–2012. Public health  
438 nutrition. 2016;19(8):1375-88.
- 439 3. Harika R, Faber M, Samuel F, Kimiywe J, Mulugeta A, Eilander A. Micronutrient  
440 status and dietary intake of iron, vitamin A, iodine, folate and zinc in women of reproductive

- 441 age and pregnant women in Ethiopia, Kenya, Nigeria and South Africa: a systematic review of  
442 data from 2005 to 2015. *Nutrients*. 2017;9(10):1096.
- 443 4. Azadbakht L, Esmailzadeh A. Macro and Micro-Nutrients Intake, Food Groups  
444 Consumption and Dietary Habits among Female Students in Isfahan University of Medical  
445 Sciences. *Iranian Red Crescent medical journal*. 2012;14(4):204-9. Epub 2012/07/04. PubMed  
446 PMID: 22754682; PubMed Central PMCID: PMC3385798.
- 447 5. Bush LA, Hutchinson J, Hooson J, Warthon-Medina M, Hancock N, Greathead K, et  
448 al. Measuring energy, macro and micronutrient intake in UK children and adolescents: a  
449 comparison of validated dietary assessment tools. *BMC Nutrition*. 2019;5(1):53. doi:  
450 10.1186/s40795-019-0312-9.
- 451 6. Herrador Z, Sordo L, Gadisa E, Buño A, Gómez-Rioja R, Iturzaeta JM, et al.  
452 Micronutrient deficiencies and related factors in school-aged children in Ethiopia: a cross-  
453 sectional study in Libo Kemkem and Fogera districts, Amhara Regional State. *PLoS One*.  
454 2014;9(12):e112858. Epub 2014/12/30. doi: 10.1371/journal.pone.0112858. PubMed PMID:  
455 25546056; PubMed Central PMCID: PMC4278675.
- 456 7. Sharma P, Dwivedi S, Singh D. Global poverty, hunger, and malnutrition: a situational  
457 analysis. *Biofortification of food crops*: Springer; 2016. p. 19-30.
- 458 8. Tariku A, Bikis GA, Woldie H, Wassie MM, Worku AG. Child wasting is a severe  
459 public health problem in the predominantly rural population of Ethiopia: A community based  
460 cross-sectional study. *Archives of Public Health*. 2017;75(1):26.
- 461 9. Bharaniidharan J, Reshmi S. Review on Malnutrition: Impact and Prevention.  
462 *International Journal*. 2019;7(3):240-3.
- 463 10. Ritchie H, Roser M. Micronutrient deficiency. *Our World in data*. 2017.
- 464 11. Ames BN. Low micronutrient intake may accelerate the degenerative diseases of aging  
465 through allocation of scarce micronutrients by triage. *Proceedings of the National Academy of*

- 466 Sciences of the United States of America. 2006;103(47):17589-94. Epub 2006/11/15. doi:  
467 10.1073/pnas.0608757103. PubMed PMID: 17101959.
- 468 12. Schneider J, Fumeaux CJF, Duerden EG, Guo T, Foong J, Graz MB, et al. Nutrient  
469 intake in the first two weeks of life and brain growth in preterm neonates. *Pediatrics*.  
470 2018;141(3):e20172169.
- 471 13. Velasco I, Bath SC, Rayman MP. Iodine as essential nutrient during the first 1000 days  
472 of life. *Nutrients*. 2018;10(3):290.
- 473 14. Keeley B, Little C, Zuehlke E. *The State of the World's Children 2019: Children, Food  
474 and Nutrition--Growing Well in a Changing World*. UNICEF. 2019.
- 475 15. Ahmed F, Prendiville N, Narayan A. Micronutrient deficiencies among children and  
476 women in Bangladesh: progress and challenges. *Journal of nutritional science*. 2016;5:e46.  
477 Epub 2017/06/18. doi: 10.1017/jns.2016.39. PubMed PMID: 28620473; PubMed Central  
478 PMCID: PMC5465809.
- 479 16. Nunn RL, Kehoe SH, Chopra H, Sahariah SA, Gandhi M, Di Gravio C, et al. Dietary  
480 micronutrient intakes among women of reproductive age in Mumbai slums. *European journal  
481 of clinical nutrition*. 2019;73(11):1536-45. doi: 10.1038/s41430-019-0429-6.
- 482 17. Kennedy GL, Pedro MR, Seghieri C, Nantel G, Brouwer I. Dietary Diversity Score Is  
483 a Useful Indicator of Micronutrient Intake in Non-Breast-Feeding Filipino Children. *The  
484 Journal of nutrition*. 2007;137(2):472-7. doi: 10.1093/jn/137.2.472.
- 485 18. Newmann SJ, Mishra K, Onono M, Bukusi EA, Cohen CR, Gage O, et al. Providers'  
486 Perspectives on Provision of Family Planning to HIV-Positive Individuals in HIV Care in  
487 Nyanza Province, Kenya. *AIDS Res Treat*. 2013;2013:915923. doi: 10.1155/2013/915923.  
488 PubMed PMID: 23738058; PubMed Central PMCID: PMC3659431.

- 489 19. Lander RL, Enkhjargal T, Batjargal J, Bailey KB, Diouf S, Green TJ, et al. Multiple  
490 micronutrient deficiencies persist during early childhood in Mongolia. *Asia Pacific journal of*  
491 *clinical nutrition*. 2008;17(3):429-40. Epub 2008/09/27. PubMed PMID: 18818163.
- 492 20. Sheehy T, Carey E, Sharma S, Biadgilign S. Trends in energy and nutrient supply in  
493 Ethiopia: a perspective from FAO food balance sheets. *Nutrition journal*. 2019;18(1):46. doi:  
494 10.1186/s12937-019-0471-1.
- 495 21. Central Statistical Agency Addis Ababa E. Ethiopia Demographic and Health Survey  
496 2016 Addis Ababa, Ethiopia 2016.
- 497 22. Dangura D, Gebremedhin S. Dietary diversity and associated factors among children  
498 6-23 months of age in Gorche district, Southern Ethiopia: Cross-sectional study. *BMC*  
499 *pediatrics*. 2017;17(1):6.
- 500 23. Birhanu M, Abegaz T, Fikre R. Magnitude and Factors Associated with Optimal  
501 Complementary Feeding Practices among Children Aged 6-23 Months in Bensa District,  
502 Sidama Zone, South Ethiopia. *Ethiopian journal of health sciences*. 2019;29(2).
- 503 24. Forsido SF, Kiyak N, Belachew T, Hensel O. Complementary feeding practices, dietary  
504 diversity, and nutrient composition of complementary foods of children 6–24 months old in  
505 Jimma Zone, Southwest Ethiopia. *Journal of Health, Population and Nutrition*. 2019;38(1):14.
- 506 25. Mulat E, Alem G, Woyraw W, Temesgen H. Uptake of minimum acceptable diet  
507 among children aged 6–23 months in orthodox religion followers during fasting season in rural  
508 area, DEMBECHA, north West Ethiopia. *BMC Nutrition*. 2019;5(1):18.
- 509 26. Sagaro GG AM. Dietary Diversity and Associated Factors Among Infants and Young  
510 Children in Wolaita Zone, Southern Ethiopia. *Science Journal of Clinical Medicine*. July  
511 2017;6, , (4,): 53-9.
- 512 27. Belay A, Joy EJ, Chagumaira C, Zerfu D, Ander EL, Young SD, et al. Selenium  
513 Deficiency Is Widespread and Spatially Dependent in Ethiopia. *Nutrients*. 2020;12(6):1565.

- 514 28. Herrador Z, Sordo L, Gadisa E, Buño A, Gómez-Rioja R, Iturzaeta J, et al.  
515 Micronutrient Deficiencies and Related Factors in School-Aged Children in Ethiopia: A Cross-  
516 Sectional Study in Libo Kemkem and Fogera Districts, Amhara Regional State. *PloS one*.  
517 2014;9:e112858. doi: 10.1371/journal.pone.0112858.
- 518 29. Shivakoti R, Christian P, Yang WT, Gupte N, Mwelase N, Kanyama C, et al.  
519 Prevalence and risk factors of micronutrient deficiencies pre- and post-antiretroviral therapy  
520 (ART) among a diverse multicountry cohort of HIV-infected adults. *Clinical nutrition*.  
521 2016;35(1):183-9. Epub 2015/02/24. doi: 10.1016/j.clnu.2015.02.002. PubMed PMID:  
522 25703452; PubMed Central PMCID: PMC4531105.
- 523 30. Serra-Majem L, Ribas L, Pérez-Rodrigo C, García-Closas R, Peña-Quintana L,  
524 Aranceta J. Determinants of nutrient intake among children and adolescents: results from the  
525 enKid Study. *Annals of Nutrition and Metabolism*. 2002;46(Suppl. 1):31-8.
- 526 31. Cheng Y, Dibley MJ, Zhang X, Zeng L, Yan H. Assessment of dietary intake among  
527 pregnant women in a rural area of western China. *BMC Public Health*. 2009;9(1):222. doi:  
528 10.1186/1471-2458-9-222.
- 529 32. Cetin I, Bühling K, Demir C, Kortam A, Prescott SL, Yamashiro Y, et al. Impact of  
530 Micronutrient Status during Pregnancy on Early Nutrition Programming. *Annals of Nutrition  
531 and Metabolism*. 2019;74(4):269-78. doi: 10.1159/000499698.
- 532 33. Birhanu M, Abegaz T, Fikre R. Magnitude and Factors Associated with Optimal  
533 Complementary Feeding Practices among Children Aged 6-23 Months in Bensa District,  
534 Sidama Zone, South Ethiopia. *Ethiop J Health Sci*. 2019;29(2):153-64. Epub 2019/04/24. doi:  
535 10.4314/ejhs.v29i2.2. PubMed PMID: 31011263; PubMed Central PMCID:  
536 PMC6460456.

- 537 34. Iannotti L. Dietary Intakes and Micronutrient Adequacy Related to the Changing  
538 Livelihoods of Two Pastoralist Communities in Samburu, Kenya. *Current Anthropology*.  
539 2014;55:475-82. doi: 10.1086/677107.
- 540 35. Bach A, Gregor E, Sridhar S, Fekadu H, Fawzi W. Multisectoral Integration of  
541 Nutrition, Health, and Agriculture: Implementation Lessons From Ethiopia. *Food and nutrition*  
542 *bulletin*. 2020:0379572119895097.
- 543 36. Haile D, Biadgilign S, Azage M. Differentials in vitamin A supplementation among  
544 preschool-aged children in Ethiopia: evidence from the 2011 Ethiopian Demographic and  
545 Health Survey. *Public health*. 2015;129(6):748-54.
- 546 37. Gebre-Egziabhere T. Emerging Regions in Ethiopia: Are they catching up with the rest  
547 of Ethiopia? *Eastern Africa Social Science Research Review*. 2018;34(1):1-36.
- 548 38. Stark J, Terasawa K, Ejigu M. Climate change and conflict in pastoralist regions of  
549 Ethiopia: mounting challenges, emerging responses. *Conflict Management and Mitigation*  
550 *(CMM) Discussion Paper*. 2011;(4).
- 551 39. Central Statistical Agency (CSA) [Ethiopia] and ICF. Ethiopia Demographic and  
552 Health Survey 2016. Addis Ababa, Ethiopia, and Rockville, Maryland, USA: CSA and ICF.  
553 2016. <https://dhsprogram.com>. 2016.
- 554 40. WHO. Use of multiple micronutrient powders for point- of- use fortification of foods  
555 consumed by infants and young children aged 6–23 months and children aged 2–12 years  
556 guideline2016. 60.  
557 [https://www.who.int/nutrition/publications/micronutrients/guidelines/mmpowders-  
558 infant6to23mons-children2to12yrs/en/](https://www.who.int/nutrition/publications/micronutrients/guidelines/mmpowders-<br/>558 infant6to23mons-children2to12yrs/en/) p.
- 559 41. Dary O, Hurrell R. Guidelines on food fortification with micronutrients. World Health  
560 Organization, Food and Agricultural Organization of the United Nations: Geneva, Switzerland.  
561 2006.



- 562 42. FAO, WHO. Human vitamin and mineral requirements. Report of a joint FAO/WHO  
563 expert consultation, Bangkok, Thailand. Food and Nutrition Division, FAO, Rome. 2001:235-  
564 47.
- 565 43. WHO. Protein and amino acid requirements in human nutrition: report of a joint  
566 FAO/WHO/UNU expert consultation. Geneva; 2007. WHO Technical Report Series. 935.
- 567 44. Organization WH. WHO guideline: use of multiple micronutrient powders for point-  
568 of-use fortification of foods consumed by infants and young children aged 6–23 months and  
569 children aged 2–12 years: World Health Organization; 2016. 60 p.
- 570 45. Russell R, Beard JL, Cousins RJ, Dunn JT, Ferland G, Hambidge K, et al. Dietary  
571 reference intakes for vitamin A, vitamin K, arsenic, boron, chromium, copper, iodine, iron,  
572 manganese, molybdenum, nickel, silicon, vanadium, and zinc. A Report of the Panel on  
573 Micronutrients, Subcommittees on Upper Reference Levels of Nutrients and of Interpretation  
574 and Uses of Dietary Reference Intakes, and the Standing Committee on the Scientific  
575 Evaluation of Dietary Reference Intakes Food and Nutrition Board Institute of Medicine. 2001.
- 576 46. Tabacchi G, Wijnhoven TM, Branca F, Roman-Vinas B, Ribas-Barba L, Ngo J, et al.  
577 How is the adequacy of micronutrient intake assessed across Europe? A systematic literature  
578 review. *The British journal of nutrition*. 2009;101 Suppl 2:S29-36. Epub 2009/07/15. doi:  
579 10.1017/s0007114509990560. PubMed PMID: 19594962.
- 580 47. Croft TN, Aileen M. J. Marshall, Courtney K. Allen, et al.,. *Guide to DHS Statistics*.  
581 Rockville, Maryland, USA: ICF. 2018.
- 582 48. Hox JJ, Moerbeek M, Van de Schoot R. *Multilevel analysis: Techniques and*  
583 *applications*. Third ed: Routledge; 2010. 364. <https://b-ok.cc/book/3695027/0a101f> p.
- 584 49. Central Statistical Agency (CSA) [Ethiopia] and ICF. 2016. *Ethiopia Demographic and*  
585 *Health Survey 2016* 2016. Addis Ababa, Ethiopia, and Rockville, Maryland, USA: CSA and  
586 ICF, ].

- 587 50. The Ethiopian Public Health Institute. Ethiopian National Micronutrient Survey Report  
588 2016. Available from:  
589 [https://www.ephi.gov.et/images/pictures/download2009/National\\_MNS\\_report.pdf](https://www.ephi.gov.et/images/pictures/download2009/National_MNS_report.pdf).
- 590 51. Aghaji AE, Duke R, Aghaji UC. Inequitable coverage of vitamin A supplementation in  
591 Nigeria and implications for childhood blindness. BMC public health. 2019;19(1):282.
- 592 52. Agrawal S, Agrawal P. Vitamin A supplementation among children in India: Does their  
593 socioeconomic status and the economic and social development status of their state of residence  
594 make a difference? International journal of medicine and public health. 2013;3(1):48.
- 595 53. The Federal Democratic Republic of Ethiopia. National Nutrition Programme: June  
596 2013–June 2015, MOH, Addis Ababa, Ethiopia 2012. Available from:  
597 [https://extranet.who.int/nutrition/gina/sites/default/files/ETH%202013%20National%20Nutri  
598 tion%20Programme.pdf](https://extranet.who.int/nutrition/gina/sites/default/files/ETH%202013%20National%20Nutrition%20Programme.pdf).
- 599 54. Ayana G, Hailu A, Tessema M, Belay A, Zerfu D, Bekele T, et al. Ethiopian National  
600 Nutrition Program End-Line Survey 2015.
- 601 55. Mengistu G, Moges T, Samuel A, Baye K. Energy and nutrient intake of infants and  
602 young children in pastoralist communities of Ethiopia. Nutrition. 2017;41:1-6.
- 603 56. Tassew AA, Tekle DY, Belachew AB, Adhena BM. Factors affecting feeding 6–23  
604 months age children according to minimum acceptable diet in Ethiopia: A multilevel analysis  
605 of the Ethiopian Demographic Health Survey. PloS one. 2019;14(2).
- 606 57. Aremu O, Lawoko S, Dalal K. Childhood vitamin A capsule supplementation coverage  
607 in Nigeria: a multilevel analysis of geographic and socioeconomic inequities. The Scientific  
608 World Journal. 2010;10:1901-14.
- 609 58. Aemro M, Mesele M, Birhanu Z, Atenafu A. Dietary diversity and meal frequency  
610 practices among infant and young children aged 6–23 months in Ethiopia: a secondary analysis

611 of Ethiopian demographic and health survey 2011. *Journal of nutrition and metabolism*.  
612 2013;2013.

613 59. Temesgen H, Negesse A, Woyraw W, Mekonnen N. Dietary diversity feeding practice  
614 and its associated factors among children age 6–23 months in Ethiopia from 2011 up to 2018:  
615 a systematic review and meta-analysis. *Italian journal of pediatrics*. 2018;44(1):1-10.

616 60. Immurana M, Arabi U. Socio-economic covariates of micronutrients supplementation  
617 and deworming among children in Ghana. *J Behav Health*. 2016;4:154-61.

618 61. Ickowitz A, Rowland D, Powell B, Salim MA, Sunderland T. Forests, trees, and  
619 micronutrient-rich food consumption in Indonesia. *PloS one*. 2016;11(5).

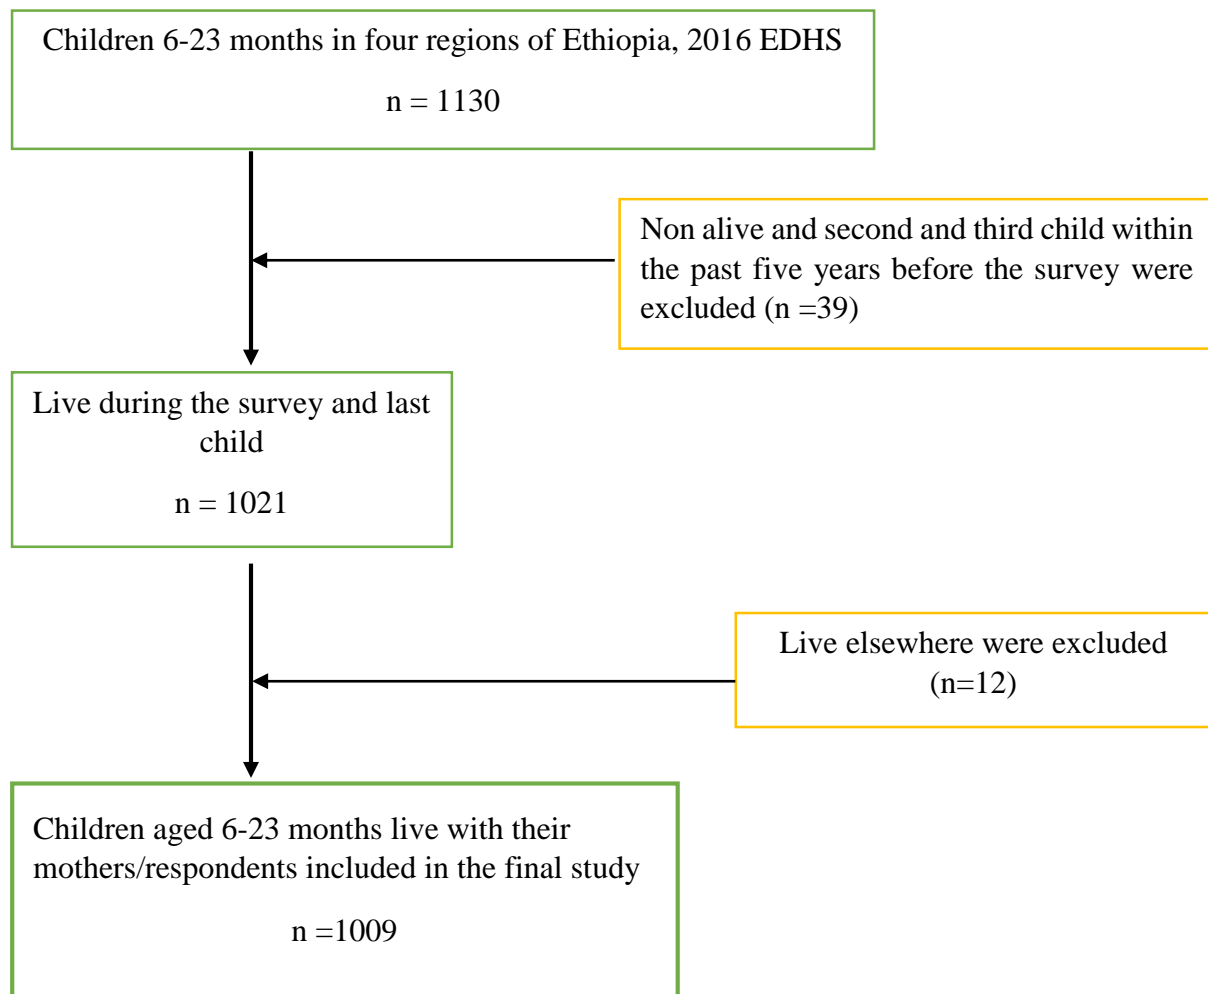

Figure 1. Sampling and exclusion procedures to identify children aged 6-23 months in the emerging regions of Ethiopia, EDHS 2016

1 **Micronutrient intake status and associated factors among children**  
2 **aged 6-23 months in the emerging regions of Ethiopia: a multilevel**  
3 **analysis of the 2016 Ethiopian demographic and health survey**

4 Tsegaye Gebremedhin\*, Andualem Yalew Aschalew, Chalie Tadie, Endalkachew Dellie, and  
5 Asmamaw Atnafu

6 Department of Health Systems and Policy, Institute of Public Health, College of Medicine and  
7 Health Sciences, University of Gondar, Gondar, Ethiopia

8 **\*Corresponding author**

9 Email: [tsegishg27@gmail.com](mailto:tsegishg27@gmail.com)[tsegishg27@gmail.com](mailto:tsegishg27@gmail.com)

## 10 Abstract

11 **Background:** Micronutrient deficiency is recognized as a major public health problem in  
12 developing countries, including Ethiopia. The scarcity of micronutrients, particularly in  
13 pastoral communities of Ethiopia, might be severe due to poor health care access, drought and  
14 poverty. However, empirical evidence is scarce in Ethiopia. Therefore, ~~the aim of~~ this study  
15 ~~was aimed~~ to assess the micronutrient intake status of children aged 6 to 23 months in the  
16 emerging regions of Ethiopia.

17 **Methods:** Data from the 2016 Ethiopia Demographic and Health Survey (EDHS) were used.  
18 A two-stage stratified sampling technique was employed to identify 1009 children aged 6 to  
19 23 months. A multilevel mixed-effect logistic regression analysis was used to identify  
20 individual and community-level factors associated with micronutrient intake status. In the final  
21 model, variables with a p-value of  $< 0.05$  and adjusted odds ratio (AOR) with 95% confidence  
22 interval (CI) were used to identify factors statistically associated with micronutrient intake  
23 status.

24 **Results:** Overall, 62.7% (95% CI: 59.7-65.7) of children aged 6 to 23 months had received at  
25 least ~~one of the minimum~~ recommended micronutrients. Antenatal care (ANC) visit (AOR:  
26 1.95, 95% CI: 1.37-2.77), work in the agriculture (AOR: 2.22, 95% CI: 1.30-3.80) and  
27 children aged 13 to 23 months (AOR: 1.72, 95% CI: 1.25-2.36) were the individual-level  
28 factors, whereas rural residence (AOR: 0.37, 95% CI: 0.14-0.88), reside in Benishangul (AOR:  
29 2.25, 95% CI: 1.29-4.93) and Gambella regions (AOR: 1.87, 95% CI: 1.03-3.38) were the  
30 community-level factors associated with micronutrient intake status.

31 ~~Conclusion~~**Conclusions:** The micronutrient intake status in the study area was low compared  
32 to the national recommendation. Promoting vitamin A and iron-rich foods and micronutrient  
33 powders at individual and community-level and strengthen supplementations and deworming

34 alongside the community-based maternal and child health services would improve the  
35 micronutrient intake among children.

## 36 **Introduction**

37 Micronutrient deficiency is recognized as a global public health problem among children, and  
38 it is worse in low- and middle-income countries, particularly in Ethiopia [1-3].

39 The commonest micronutrients needed for life are iron, zinc, calcium, iodine, and vitamins,  
40 which can be found from foods rich in vitamins and minerals or in the form of supplements,  
41 such as vitamin A supplement [4-6]. Although micronutrients are only needed in small  
42 quantities, their absence from children's diet negatively affects the survival and development  
43 of children. Micronutrient deficiency may lead to devastating consequences, like stunting,  
44 wasting, weakened immunity, and ~~delays~~delay in cognitive development [7-11]. Notably,  
45 micronutrient is very critical during the first two years of a child's life; as adequate nutrition  
46 during this period promotes healthy growth and development. Yet, micronutrient deficiency  
47 received less attention than the apparent starvation of people who are unable to get enough  
48 food to survive [12, 13].

49 Furthermore, most infants and young children around the world are not getting the healthy diets  
50 that they need for life and grow well. According to the United Nations Children's Fund  
51 (UNICEF) 2019 report, there were around 340 million children worldwide who suffered from  
52 hidden hunger caused by deficiencies of vitamins and minerals [14]. Globally, a million child  
53 deaths per year due to vitamin A and zinc deficiencies were reported in 2016 [15-17].  
54 Nevertheless, the magnitude of the problem is much higher in low- and middle-income  
55 countries; only 29% of children aged 6–23 months were fed the minimum diversified diet ~~that~~  
56 ~~is~~ needed for growth and development [18].

57 Similarly, the deficiency of crucial vitamins and mineral are among the significant public  
58 health problems in Ethiopia. ~~The~~These deficiencies are a result of diets with limited diversity,  
59 minimal bioavailability, frequent meal skipping, limited access to micronutrient-rich and



60 fortified foods, and low vegetable and fruit intake [15, 19, 20]. According to the Ethiopian  
61 Demographic and Health Survey (EDHS) 2016 report, only 14% of the children aged 6–23  
62 months received the minimum dietary diversity [21]. Moreover, studies in different parts of the  
63 country reported only 13 to 43.2% of children aged 6-23 months consumed a diversified diet  
64 [22-26]. The Ethiopian national nutritional supplementation survey (2016) indicated that  
65 vitamin A supplementation coverage in children was 63%, which is lower than the national  
66 target (more than 90%) and vitamin A deficiency was significant (14%) [27].  
67 Micronutrient intake is associated with a variety of various factors at individual and community  
68 levels, including mothers' sociodemographic and child characteristics, dietary habits,  
69 community-level lifestyle and place of residence [28-30]. On top of the above factors, the use  
70 of maternal healthcare services, such as antenatal care (ANC), institutional delivery and  
71 postnatal care (PNC) visits, are also associated with the micronutrient intake status of children  
72 [31, 32].  
73 Although there is documented evidence of insufficient micronutrient intake for agrarian  
74 communities and urban dwellers in Ethiopia [22, 24, 25, 33], there is little evidence on  
75 micronutrient intake among children aged 6-23 months in emerging regions of Ethiopia where  
76 pastoralist communities, with poor cultivation of fruits and vegetables, are mainly reside [34].  
77 Additionally, these regions have been identified as the hotspot in the country with high food  
78 insecurity, high child malnutrition rates, and the recurrent onset of droughts [35, 36].  
79 Besides, these areas have limited access to health facilities, low poor infrastructure and  
80 inaccessible health services that could worsen the micronutrient deficiency [37, 38]. However,  
81 studies that show the individual and community-level factors of micronutrient intake among  
82 children are rare. The objective of this study is, therefore, to assess the micronutrient intake  
83 status and related factors among children aged 6-23 months in emerging regions of Ethiopia by

Formatted: Font color: Text 1

84 using the 2016 EDHS data. Moreover, the finding could give important insights to develop  
85 contextual strategies for the mitigation of the problem.

## 86 **Materials and Methods**

### 87 **Study settings and data source**

88 The study used the EDHS 2016 data, ~~which is~~ a nationally representative household survey  
89 data collected every five years. It has been implemented by the Central Statistical Agency  
90 (CSA) [39] with the primary objective of providing up-to-date estimates of key demographic  
91 and health indicators. Administratively, Ethiopia is divided into nine and two geographical  
92 regions and administrative cities, respectively. Of the total regional states, Afar, Somali,  
93 Benishangul, and Gambela are the emerging regions of Ethiopia where pastoralists  
94 predominantly live.

### 95 **Sampling procedures**

96 The sampling frame for the 2016 EDHS used the 2007 Ethiopian population and housing  
97 census, which was conducted by the CSA of Ethiopia. The census used a complete list of  
98 84,915 enumeration areas (EAs), which contains the location, type of residence, and the  
99 estimated number of residential households. Then the sample for the 2016 EDHS was stratified  
100 in two stages, and samples of EAs were selected independently from each stratum. The regions  
101 were stratified into urban and rural areas. At each of the lower administrative levels, implicit  
102 stratification and proportional allocation were achieved within each sampling stratum before  
103 sample selection at different levels.

104 In the first stage, 645 EAs were selected with probability proportional to the EA size, and each  
105 sampling stratum was selected from the given samples. The total residential households in the  
106 EA were the EA size, and a household listing operation was implemented. Then, the resulting

107 lists of households were used as the sampling frame for the selection of households in the  
108 second stage. Some of the selected EAs were large. The selected large EAs with more than 200  
109 households were segmented to minimize the task of household listing. Through the probability  
110 proportional to the segment size, only a segment was selected for the survey, and the household  
111 listing was conducted for each selected segment.

112 A fixed number of 28 households from each cluster were selected with an equal probability in  
113 the second stage, a systematic selection from the newly created household listing. The survey  
114 interviewer interviewed only pre-selected households. No replacements or changes of the pre-  
115 selected households were allowed in the implementing stages to prevent bias. In this study, the  
116 2016 EDHS childhood datasets of the four emerging regional states: Afar, Benishangul,  
117 Gambella, and Somali, were used for analysis.

118 All women aged 15-49 years who are the usual members of the selected households were  
119 eligible for the female survey. Children aged 6–23 months were the source population and  
120 included 1009 mothers and their children aged 6-23 months were included in the analysis.

121 Alive, ~~index to birth history first~~ **last child**, and live with their mothers/caregivers were  
122 included, while those second and above ~~index to birth history~~ child and live with other than  
123 their mothers/caregivers were excluded from the analysis (Fig 1). Additionally, for twins, a  
124 mother was asked for a child only. Potential individual and community level independent  
125 variables were also extracted and further analysis was done.

Formatted: Highlight

126

127

128 **Fig 1.** Sample study selection of children age 6-23 months in emerging regions, EDHS 2016

129

130

131

132 **Measurements of variables**

133 The dependent variable of the study was micronutrient intake status among children aged 6-23  
134 months, which was determined from the reports of mothers regarding the routine micronutrient  
135 intake of their children. The intake status was measured based on the recommendations of daily  
136 micronutrient intake that meets the micronutrient requirements of almost all healthy individuals  
137 in age and sex-specific population groups [40-43]. The recommended micronutrient for  
138 children are foods rich in vitamin A within 24 hours, foods rich in iron within 24 hours, multiple  
139 micronutrient powder within seven days, iron supplements within seven days, vitamin A  
140 supplements within six months, or deworming medication within six months [41, 42, 44-46].  
141 Accordingly, if the children received at least one of the minimum recommended  
142 micronutrients, we considered as "Yes"; if the children received none of the minima  
143 recommended micronutrients, it was considered as "No".

144 Foods rich in vitamin A were measured by the consumption of either of the seven food groups  
145 within the preceding 24 hours. These food groups were I. Eggs, ii. Meat (beef, pork, lamb,  
146 chicken), iii. pumpkin, carrots, and squash, iv. any dark green leafy vegetables, v. mangoes,  
147 papayas, and others with vitamin A fruits, vi. Liver, heart, and other organs and vii. Fish or  
148 shellfish.

149 Foods rich in iron were measured by the consumption of either of the four iron-rich food groups  
150 within the past 24 hours. These groups were i. eggs, ii. meat (beef, pork, lamb, chicken), iii.  
151 Liver, heart, and other organs, and iv. Fish or shellfish.

152 Multiple micronutrient powders were assessed by asking the mother whether their child had  
153 received micronutrient powders in the previous seven days. The micronutrients contained a

154 range of vitamins and minerals (and nearly always include iron, per WHO recommendations)  
155 enclosed in a single-dose sachet added to foods; Sprinkles™ is a brand name used for  
156 micronutrient powders.

157 ~~The iron~~Iron supplementation was assessed by asking the mothers whether their child had iron  
158 supplementation defined as iron pills, sprinkles with iron, or iron syrup in the previous seven  
159 days.

160 Vitamin A supplementation and deworming medication have been provided for children aged  
161 6-59 months by semi-annually as a national nutrition program. For this study, vitamin A  
162 supplementation and deworming were assessed for those 6 to 23 months of children whether  
163 they received for the last six months or not by reviewing the integrated child card, which  
164 consists of immunization and growth monitoring history.

165 Individual and community-level characteristics were the independent variables. The  
166 individual-level variables were individual sociodemographic and economic characteristics,  
167 obstetric history of the women, and child characteristics. ~~Whereas~~At the same time, the  
168 community-level variables were residence, region, community-level poverty, community-level  
169 media exposure, the distance of the nearest health facility.

170 ~~Wealth~~The wealth quintile was calculated as an index based on consumer goods such as  
171 television, bicycle, or car. Household characteristics were also considered in calculating the  
172 wealth index. These scores were derived using principal component analysis and ranked into  
173 poor, middle, and rich. The wealth quintiles are expressed in terms of quintiles of individuals  
174 in the population rather than quintiles of individuals at risk for anyone's health or population  
175 indicator.

176 Distance to the health facility was assessed by the question “distance to the nearest health  
177 facility is a problem?” and the responses were categorized as “big problem” or “not a problem”  
178 [47].

179 Community-level poverty was assessed using the asset index based on data from the entire  
180 country sample on separate scores prepared for rural and urban households, and combined to  
181 produce a single asset index for all households as the community level and ranked into five  
182 (poorest, poorer, middle, richer, and richest).

183 Community media exposure was assessed as “yes” if they have access to all three media  
184 (newsletter, radio, and television) at least once a week, otherwise “no” if they did not have any  
185 media exposure.

## 186 **Data processing and statistical analysis**

187 The data were cleaned, re-coded and analysed using STATA (StataCorp, College Station, TX)  
188 version 14. Descriptive statistics were presented using tables and narration to describe the  
189 magnitude of micronutrient intake status by sociodemographic, maternal obstetric and child  
190 characteristics.

191 A multilevel analysis was conducted after checking the eligibility. The model eligibility was  
192 assessed by calculating the Intra-class Correlation Coefficient (ICC) and model with ICC  
193 greater than 10% is eligible for multilevel analysis. In this study, the ICC was 27.3%. Since the  
194 data were hierarchical (individuals were nested within communities), a two-level mixed-effects  
195 logistic regression model was fitted to estimate both the individual and community level  
196 variables (fixed and random) effect on micronutrient intake status, and the log of the probability  
197 of micronutrient intake was modelled using the formula as follows [48]:

$$198 \quad \log \left[ \frac{\pi_{ij}}{1 - \pi_{ij}} \right] = \beta_0 + \beta_1 X_{ij} + \beta_2 Z_{ij} + U_j + e_{ij}$$

199 Where  $i$  is individual level unit and  $j$  is a community-level unit;  $X$  and  $Z$  refer to individual and  
200 community-level variables, respectively;  $\pi_{ij}$  is the probability of micronutrient intake for the  
201  $i^{\text{th}}$  child in the  $j^{\text{th}}$  community; the  $\beta$ 's are the fixed coefficients. Whereas,  $\beta_0$  is the intercept-the  
202 effect on the probability of micronutrient intake in the absence of influence of predictors; and  
203  $u_j$  showed the effect of the community (random effect) on micronutrient intake for the  $j^{\text{th}}$   
204 community and  $e_{ij}$  showed random errors at the individual levels. By assuming each community  
205 had different intercept ( $\beta_0 + U_j$ ) and fixed coefficient ( $\beta_{1,2}$ ), the clustered data nature and the  
206 within and between community variations were taken into account.

207 Bivariable and multivariable analysis were computed. First, in the bivariable logistic regression  
208 analysis, a p-value of less than 0.2 was used to fitted three models (models for the individual  
209 level, community level, and both the individual and community level). Then, in the final model  
210 (fixed effect), a p-value less than 0.05 and adjusted odds ratio (AOR) with 95% confidence  
211 interval (CI) were used to estimate the association of individual and community level factors  
212 with micronutrient intake status.

213 The measures of variation (random-effects) were reported using ICC and proportional change  
214 in variance (PCV) to measure the variation between clusters. The ICC refers to the ratio of the  
215 between-cluster variance to the total variance, and it tells us the proportion of the total variance  
216 in the outcome variable that is accounted at the cluster level. The loglikelihood test was used  
217 to estimate the goodness of fit of the adjusted final model in comparison to the preceding  
218 models. A model with the smallest value of loglikelihood is better; accordingly, model three (a  
219 model for both the individual and community level variables) had the lowest value.

## 220 **Ethical considerations**

221 The ethical approval and permission to access the data were obtained from the MEASURE  
 222 DHS (available from <https://www.dhsprogram.com/Data/>: accessed on April 06, 2020) after a  
 223 brief study concept was submitted.

## 224 Results

### 225 Sociodemographic and economic characteristics of participants

226 A total of 1009 mothers/caregivers with children aged 6-23 months were included in the final  
 227 analysis. The mean age of the mothers was 27.5 (SD ± 6.3) years, and 83.9% of them were  
 228 rural dwellers. The majority (72.4%) of the households were in the poor wealth status; the mean  
 229 family size was 5.9 (SD± 2.3). Nearly one-third (34.3%) of the participants were from the  
 230 Somali region and the majority (71.1%) were Muslim by religion. Of the participants, 95.2%  
 231 were married; 59.3% with no education and 66.5% had no work. Similarly, 59.3 and 46.6% of  
 232 their husbands/partners had no education and agricultural workers, respectively (Table 1).

233 Table 1. Sociodemographic and economic characteristics of study participants in emerging  
 234 regions of Ethiopia, 2016 (n=1009).

Formatted: Font: Not Bold

| Variables                                              | Category    | Frequency (n) | Percent (%) |
|--------------------------------------------------------|-------------|---------------|-------------|
| Age of mothers/caregivers in <del>complete</del> years | 15-24       | 341           | 33.8        |
|                                                        | 25-34       | 497           | 49.3        |
|                                                        | >=35        | 171           | 16.9        |
| Residence                                              | Urban       | 163           | 16.1        |
|                                                        | Rural       | 846           | 83.9        |
| Region                                                 | Afar        | 254           | 25.2        |
|                                                        | Somali      | 346           | 34.3        |
|                                                        | Benishangul | 224           | 22.2        |
|                                                        | Gambela     | 185           | 18.3        |
| Religion                                               | Muslim      | 717           | 71.1        |
|                                                        | Protestant  | 173           | 17.1        |
|                                                        | Orthodox    | 85            | 8.4         |
|                                                        | Others*     | 34            | 3.4         |
| Sex of <del>head of</del> household <u>head</u>        | Male        | 674           | 66.8        |
|                                                        | Female      | 335           | 33.2        |
| Household wealth status                                | Poor        | 730           | 72.4        |



| Variables                                         | Category            | Frequency (n) | Percent (%) |
|---------------------------------------------------|---------------------|---------------|-------------|
|                                                   | Middle              | 78            | 7.7         |
|                                                   | Rich                | 201           | 19.9        |
| Current marital status                            | Married             | 961           | 95.2        |
|                                                   | Unmarried           | 48            | 4.8         |
| Educational status of mothers/caregivers          | No education        | 715           | 70.9        |
|                                                   | Primary education   | 199           | 19.7        |
|                                                   | Secondary education | 67            | 6.6         |
|                                                   | Higher              | 28            | 2.8         |
| Educational status of husband's/partner's (n=961) | No education        | 570           | 59.3        |
|                                                   | Primary education   | 197           | 20.5        |
|                                                   | Secondary education | 104           | 10.8        |
|                                                   | Higher              | 90            | 9.4         |
| Respondent's occupation                           | No work             | 671           | 66.5        |
|                                                   | Professional worker | 80            | 7.9         |
|                                                   | Agricultural worker | 189           | 18.7        |
|                                                   | Others**            | 69            | 6.8         |
| Husband's/partner's occupation (n=961)            | No work             | 139           | 14.5        |
|                                                   | Professional worker | 175           | 18.2        |
|                                                   | Agricultural worker | 448           | 46.6        |
|                                                   | Others***           | 199           | 20.7        |

235 \*Catholic, traditional, Joba,

236 \*\*Daily labor, merchant

237 \*\*\*Daily labor, merchant

### 238 **Obstetric history of participants**

239 The majority (54.5%) of women were in the age group of 18 to 24 years when they gave their  
240 first birth. Of the total women, 45.2% of them were multipara, and 59.9% have two to five  
241 living children. Nearly 56% of the women had ANC visits for their recent birth, and out of  
242 them, 55.9% had first visit. Furthermore, only one-fourth of the women delivered at health  
243 facilities, and 7.2% of them had PNC checks within two months after delivery (Table 2).

244 Table 2. Obstetric characteristics of participants in the emerging regions of Ethiopia, 2016  
245 (n=1009).

Formatted: Font: Not Bold

| Variables                                               | Category                      | Frequency (n) | Percent (%) |
|---------------------------------------------------------|-------------------------------|---------------|-------------|
| Age of the mother at first birth (in years)             | <18                           | 402           | 39.8        |
|                                                         | 18-24                         | 550           | 54.5        |
|                                                         | 25+                           | 57            | 5.7         |
| Parity                                                  | Primipara                     | 176           | 17.4        |
|                                                         | Multipara                     | 456           | 45.2        |
|                                                         | Grand multipara               | 377           | 37.4        |
| Number of living children                               | 1                             | 174           | 17.2        |
|                                                         | 2-5                           | 604           | 59.9        |
|                                                         | 6+                            | 231           | 22.9        |
| ANC visit                                               | Yes                           | 569           | 56.4        |
|                                                         | No                            | 440           | 43.6        |
| Desire for more children                                | Wants                         | 798           | 79.1        |
|                                                         | Undecided                     | 43            | 4.3         |
|                                                         | Wants no more                 | 168           | 16.6        |
| Place of delivery                                       | Home                          | 745           | 73.8        |
|                                                         | Health facility               | 264           | 26.2        |
| PNC check within two months                             | Yes                           | 73            | 7.2         |
|                                                         | No                            | 936           | 92.8        |
| Timing after postnatal delivery check took place (n=73) | Within 24hrs                  | 7             | 9.6         |
|                                                         | 1-7 <sup>th</sup> day         | 41            | 56.2        |
|                                                         | After the 7 <sup>th</sup> day | 25            | 34.2        |
| Current pregnancy status                                | Pregnant                      | 90            | 8.9         |
|                                                         | Non-pregnant                  | 919           | 91.1        |

246 ANC: Antenatal care, PNC: Postnatal care

247 **Child characteristics and common childhood illness**

248 Of the total children, 54.1% were male and 54.2% were in the age group of 13 to 23 months.

249 Moreover, 42.0% of the children had average birth weight;55.8% of the children were found

250 between the second and fifth-order of birth. Approximately 96% of the children were measured

251 their current weight, and of those, 79.0% were weighted 7-11kgs. Additionally, 15.9, 13.6, and

252 15.8% of the children had diarrhea, cough, and fever within the last two weeks, respectively  
 253 (Table 3).

254 **Table 3. Child characteristics and common childhood illness among children aged 6 to 23**  
 255 months in the emerging regions of Ethiopia, 2016 (n=1009).

Formatted: Font: Not Bold

| Variables                                  | Category | Frequency (n) | Percent (%) |
|--------------------------------------------|----------|---------------|-------------|
| Sex of the child                           | Male     | 546           | 54.1        |
|                                            | Female   | 463           | 45.9        |
| The current age of the child in months     | 6-12     | 462           | 45.8        |
|                                            | 13-23    | 547           | 54.2        |
| Size of a child at birth                   | Large    | 269           | 26.7        |
|                                            | Average  | 424           | 42.0        |
|                                            | Small    | 316           | 31.3        |
| Birth order                                | 1        | 176           | 17.4        |
|                                            | 2-5      | 563           | 55.8        |
|                                            | 6+       | 270           | 26.8        |
| Preceding birth interval in months (n=833) | <=24     | 241           | 28.9        |
|                                            | 25-36    | 282           | 33.8        |
|                                            | 37-48    | 163           | 19.6        |
|                                            | >=49     | 147           | 17.7        |
| Current weight of the child measured       | Yes      | 964           | 95.6        |
|                                            | No       | 45            | 4.4         |
| Current weight of child in kg (n=964)      | <7       | 145           | 15.0        |
|                                            | 7-11     | 762           | 79.0        |
|                                            | 11+      | 57            | 6.0         |
| Had diarrhoea                              | Yes      | 160           | 15.9        |
|                                            | No       | 849           | 84.1        |
| Had cough                                  | Yes      | 137           | 13.6        |
|                                            | No       | 872           | 86.4        |
| Had fever                                  | Yes      | 159           | 15.8        |
|                                            | No       | 850           | 84.2        |

256 **Community-level poverty, media exposure and access to a health facility**  
 257 The analysis showed that 63.1, 16.1, 9.3, 7.3 and 4.2% of the communities are in the poorest,  
 258 poorer, middle, richer and richest status, respectively. Only five percent of the community has  
 259 media exposure. Additionally, 42.0% of the respondents mentioned that access to a health  
 260 facility is not a problem.

261 **Micronutrient intake status among children aged 6-23 months**

262 Overall, 62.7% (95% CI: 59.7-65.7) of the children received the minimum recommended  
 263 micronutrients. Of those who took the recommended micronutrient, only 12.9% had received  
 264 three and above micronutrient types.

265 Moreover, 27.8% (95% CI: 25.0-30.5) of the children consumed foods rich in vitamin A at any  
 266 time in 24 hours preceding the interview, and 15.6% (95% CI: 13.3-17.8) of them have  
 267 consumed foods rich in iron at any time in 24 hours preceding the interview. Additionally,  
 268 7.5% (95% CI: 5.9-9.2) of the children received multiple micronutrient powder in the seven  
 269 days preceding the interview, and 6.0% (95% CI: 4.5-7.4) of them received iron supplements  
 270 in the seven days preceding the interview. Around 47% (95% CI: 44.1-50.3) of the children  
 271 received vitamin A supplements in the six months preceding the interview. Besides, 8.4% (95%  
 272 CI: 5.5-8.7) of the children aged 12 to 23 months of were received deworming medication in  
 273 the six months preceding the interview (Table 4).

274 **Table 4. Micronutrient intake status among children aged 6-23 months in the emerging regions**  
 275 **of Ethiopia, 2016 (n=1009).**

Formatted: Font: Not Bold

| Food groups and supplementations                 | Contains/measurements                              | Received<br>n (%) | No received<br>n (%) |
|--------------------------------------------------|----------------------------------------------------|-------------------|----------------------|
| Consumed foods rich in vitamin A within 24 hours | Eggs                                               | 85 (8.4)          | 924 (91.6)           |
|                                                  | Meat (beef, pork, lamb, chicken, etc)              | 52 (5.2)          | 957 (94.8)           |
|                                                  | Pumpkin, carrots, and squash                       | 111 (11.0)        | 898 (89.0)           |
|                                                  | Any dark green leafy vegetables                    | 91 (9.0)          | 918 (91.0)           |
|                                                  | Mangoes, papayas, and others with vitamin A fruits | 133 (13.2)        | 876 (86.8)           |
|                                                  | Liver, heart, and other organs                     | 32 (3.2)          | 977 (96.8)           |

Formatted: Left

|                                                                         |                                  |                   |                   |
|-------------------------------------------------------------------------|----------------------------------|-------------------|-------------------|
|                                                                         | Fish or shellfish.               | 45 (4.5)          | 964 (95.5)        |
| <b>Overall vitamin A rich foods consumptions</b>                        |                                  | <b>280 (27.7)</b> | <b>729 (72.3)</b> |
| Consumed foods rich in iron at any time in 24 hours                     | Eggs                             | 85 (8.4)          | 924 (91.6)        |
|                                                                         | Meat (beef, pork, lamb, chicken) | 52 (5.2)          | 957 (94.8)        |
|                                                                         | Liver, heart, and other organs   | 32 (3.2)          | 977 (96.8)        |
|                                                                         | Fish or shellfish.               | 45 (4.5)          | 964 (95.5)        |
| <b>Overall iron rich food consumption</b>                               |                                  | <b>157 (15.6)</b> | <b>852 (84.4)</b> |
| Multiple micronutrient powder within seven days                         |                                  | 76 (7.5)          | 933 (92.5)        |
| Iron supplements within seven days                                      |                                  | 60 (6.0)          | 949 (94.0)        |
| Vitamin A supplements within six months                                 |                                  | 476 (47.2)        | 533 (52.8)        |
| Deworming medication in the six months (n=547)                          |                                  | 46 (8.4)          | 501 (91.6)        |
| <b>Overall, received at least the minimum recommended micronutrient</b> |                                  | <b>633 (62.7)</b> | <b>376 (37.3)</b> |

276 **Random effects (measures of variation)**

277 There was a significant variation in the intake of micronutrients among children aged 6 to 23  
278 months across the communities (clusters). The intra-cluster correlation coefficient (ICC) in the  
279 null model (model 0) for micronutrient intake was 0.273. In other words, 27.3% of the variation  
280 in micronutrient intake among children aged 6 to 23 months is due to the differences between  
281 regions/clusters (between-cluster variation) (Table 5).

282 Table 5. Results from a random intercept model (a measure of variation) for micronutrient  
283 intake among children aged 6 to 23 months at cluster level by multilevel logistic regression  
284 analysis, EDHS 2016.

Formatted: Font: Not Bold

| Measure of variations         | Model 0<br>(null model) | Model 1 | Model 2 | Model 3<br>(full model) |
|-------------------------------|-------------------------|---------|---------|-------------------------|
| Variance                      | 3.35                    | 1.49    | 1.61    | 1.43                    |
| Explained variation (PCV) (%) | Ref.                    | 55      | 52      | 57                      |

|                              |        |        |        |        |
|------------------------------|--------|--------|--------|--------|
| ICC (%)                      | 27.3   | 62.2   | 73.3   | 79.9   |
| Model fitness                |        |        |        |        |
| Deviance (-2*log likelihood) | 1271.9 | 1154.7 | 1195.0 | 1135.4 |
| AIC                          | 1275.9 | 1200.4 | 1214.5 | 1193.8 |

285 AIC: Akaike's Information Criterion

286 ICC: Intra-class Correlation Coefficient

287 PCV: Proportional Change in Variance

288 Model 0: without independent variables (null model)

289 Model 1: only individual-level variables

290 Model 2: only community-level variables

291 Model 3: individual and community-level variables (full model)

292 **Individual and community-level factors of micronutrient intake status (fixed**  
 293 **effects)**

294 In the bivariable analysis, mothers educational status and occupation, sex of household head,  
 295 household wealth status, age at first birth, ANC and PNC visits, place of delivery, desire for  
 296 more child, age of the child, currently breastfeeding, history of diarrhea and cough within the  
 297 last two weeks and current pregnancy status was the individual level candidate variables.  
 298 Whereas residence, region, community-level poverty and community level media exposure  
 299 were the community level candidate variables.

300 In the final model (model 3), after adjusting for individual and community level factors,  
 301 women's occupational status, the current age of the child, antenatal visits for current pregnancy,  
 302 residence and region were significantly associated with the micronutrient intake status among  
 303 children aged 6 to 23 months.

304 Accordingly, children whose mothers/caregivers with an agricultural occupation were 2.22  
305 times more likely to receive the recommended micronutrient compared to those children whose  
306 mothers/caregivers with no work (AOR: 2.22, 95% CI: 1.30-3.80). Children born from mothers  
307 who had ANC visits for their recent pregnancy were 1.95 times more likely to receive the  
308 recommended micronutrient compared to those who had not ANC visits (AOR: 1.95, 95%  
309 CI:1.37-2.77). Those children aged 13 to 23 months were 1.72 times more likely to receive the  
310 recommended micronutrient compared to those aged 6 to 12 months (AOR: 1.72, 95% CI:  
311 1.25-2.36). Those children who reside in the rural communities were 63% less likely to receive  
312 the recommended micronutrient compared to their counterparts (AOR: 0.37, 95% CI: 0.14-  
313 0.88). Children who live in the Benishangul and Gambella region were 2.52 (AOR: 2.52, 95%  
314 CI: 1.29-4.93) and 1.87 (AOR: 1.87, 95% CI: 1.03-3.38) times more likely to take the  
315 recommended micronutrient compared to those children who live in the Afar region,  
316 respectively (Table 6).

317 Table 6. Multilevel logistic regression analysis of factors associated with micronutrient intake status among children aged 6-23 months in the  
 318 emerging regions of Ethiopia, EDHS 2016 (n=1009).

Formatted: Font: Not Bold

| Variables                               | Received <u>at least one of</u> the recommended <u>micronutrient</u> <u>micronutrients</u> |            | COR (95% CI)     | Model 0 (ICC: 27.3%) | Model 1 AOR (95% CI) | Model 2 AOR (95% CI) | Model 3 AOR (95% CI) |
|-----------------------------------------|--------------------------------------------------------------------------------------------|------------|------------------|----------------------|----------------------|----------------------|----------------------|
|                                         | Yes n (%)                                                                                  | No n (%)   |                  |                      |                      |                      |                      |
| <b>Individual-level characteristics</b> |                                                                                            |            |                  |                      |                      |                      |                      |
| <b>Mothers educational status</b>       |                                                                                            |            |                  |                      |                      |                      |                      |
| No education                            | 409 (57.2)                                                                                 | 306 (42.8) | 1                |                      | 1                    |                      | 1                    |
| Primary                                 | 150 (75.4)                                                                                 | 49 (24.6)  | 1.89 (1.24-2.88) |                      | 1.44 (0.94-2.22)     |                      | 1.19 (0.76-1.87)     |
| Secondary                               | 52 (77.6)                                                                                  | 15 (22.4)  | 2.38 (1.19-4.76) |                      | 1.52 (0.75-3.10)     |                      | 1.20 (0.57-2.54)     |
| Higher                                  | 22 (78.6)                                                                                  | 6 (21.4)   | 2.47 (0.84-7.20) |                      | 1.17 (0.38-3.56)     |                      | 0.83 (0.25-2.75)     |
| <b>Household head</b>                   |                                                                                            |            |                  |                      |                      |                      |                      |
| Male                                    | 435 (64.5)                                                                                 | 239 (35.5) | 1                |                      | 1                    |                      | 1                    |
| Female                                  | 198 (59.1)                                                                                 | 137 (40.9) | 0.77 (0.55-1.07) |                      | 0.81 (0.58-1.12)     |                      | 0.86 (0.61-1.19)     |
| <b>Mothers' occupation</b>              |                                                                                            |            |                  |                      |                      |                      |                      |
| No work                                 | 371 (55.3)                                                                                 | 300 (44.7) | 1                |                      | 1                    |                      | 1                    |
| Professional                            | 57 (71.3)                                                                                  | 23 (28.7)  | 1.78 (0.98-3.21) |                      | 1.38 (0.75-2.54)     |                      | 1.38 (0.75-2.55)     |
| Agricultural                            | 154 (81.5)                                                                                 | 35 (18.5)  | 3.34 (2.06-5.43) |                      | 3.04 (1.89-4.88)     |                      | 2.22 (1.30-3.80) *   |
| Others                                  | 51 (73.9)                                                                                  | 18 (26.1)  | 2.03 (1.07-3.86) |                      | 1.51 (0.78-2.93)     |                      | 1.34 (0.68-2.62)     |
| <b>Wealth status</b>                    |                                                                                            |            |                  |                      |                      |                      |                      |
| Poor                                    | 418 (57.3)                                                                                 | 312 (42.7) | 1                |                      | 1                    |                      | 1                    |
| Middle                                  | 61 (78.2)                                                                                  | 17 (21.8)  | 2.33 (1.23-4.40) |                      | 1.43 (0.75-2.74)     |                      | 1.17 (0.46-3.00)     |
| Rich                                    | 154 (76.6)                                                                                 | 47 (23.4)  | 2.12 (1.34-3.59) |                      | 1.40 (0.86-2.26)     |                      | 0.54 (0.20-1.47)     |
| <b>Age at first birth in years</b>      |                                                                                            |            |                  |                      |                      |                      |                      |
| Less than 18                            | 248 (61.7)                                                                                 | 154 (38.3) | 1                |                      | 1                    |                      | 1                    |
| 18-24                                   | 347 (63.1)                                                                                 | 203 (36.9) | 1.23 (0.89-1.69) |                      | 1.18 (0.86-1.62)     |                      | 1.18 (0.86-1.63)     |



|                                 |            |            |                  |  |                  |  |                    |
|---------------------------------|------------|------------|------------------|--|------------------|--|--------------------|
| 25+                             | 38 (66.7)  | 19 (33.3)  | 1.54 (0.76-3.13) |  | 1.43 (0.72-2.87) |  | 1.40 (0.69-2.86)   |
| ANC visit                       |            |            |                  |  |                  |  |                    |
| No                              | 214 (48.6) | 226 (51.4) | 1                |  | 1                |  | 1                  |
| Yes                             | 419 (73.6) | 150 (26.3) | 2.78 (2.01-3.84) |  | 2.03 (1.43-2.86) |  | 1.95 (1.37-2.77) * |
| Place of delivery               |            |            |                  |  |                  |  |                    |
| Home                            | 429 (57.6) | 316 (42.4) | 1                |  | 1                |  | 1                  |
| Health facility                 | 204 (77.3) | 60 (22.7)  | 2.39 (1.61-3.54) |  | 1.31 (0.85-2.02) |  | 1.20 (0.77-1.89)   |
| PNC visit                       |            |            |                  |  |                  |  |                    |
| Yes                             | 62 (84.9)  | 11 (15.1)  | 1                |  | 1                |  | 1                  |
| No                              | 571 (61.0) | 365 (39.0) | 0.30 (0.14-0.64) |  | 0.54 (0.25-1.13) |  | 0.54 (0.25-1.17)   |
| Desire more child               |            |            |                  |  |                  |  |                    |
| Wants                           | 478 (59.9) | 320 (40.1) | 1                |  | 1                |  | 1                  |
| Undecided                       | 27 (62.8)  | 16 (37.2)  | 1.24 (0.59-2.59) |  | 1.05 (0.50-2.19) |  | 1.15 (0.55-2.39)   |
| Wants no more                   | 128 (76.2) | 40 (23.8)  | 1.94 (1.24-3.05) |  | 1.87 (1.19-2.94) |  | 1.54 (0.96-2.46)   |
| Child currently breastfeed      |            |            |                  |  |                  |  |                    |
| No                              | 111 (56.1) | 87 (43.9)  | 1                |  | 1                |  | 1                  |
| Yes                             | 522 (64.4) | 289 (35.6) | 1.36 (0.93-1.98) |  | 1.17 (0.76-1.82) |  | 1.15 (0.74-1.80)   |
| Currently pregnant              |            |            |                  |  |                  |  |                    |
| No                              | 585 (63.7) | 334 (36.3) | 1                |  | 1                |  | 1                  |
| Yes                             | 48 (53.3)  | 42 (46.7)  | 0.62 (0.36-1.05) |  | 0.73 (0.40-1.32) |  | 0.79 (0.43-1.44)   |
| Age of child in months          |            |            |                  |  |                  |  |                    |
| 6-12                            | 259 (56.1) | 203 (43.9) | 1                |  | 1                |  | 1                  |
| 13-23                           | 374 (68.4) | 173 (31.6) | 1.74 (1.28-2.35) |  | 1.79 (1.31-2.45) |  | 1.72 (1.25-2.36) * |
| Diarrhoea in the last two weeks |            |            |                  |  |                  |  |                    |
| No                              | 522 (61.5) | 327 (38.5) | 1                |  | 1                |  | 1                  |
| Yes                             | 111 (69.4) | 49 (30.6)  | 1.53 (1.00-2.35) |  | 1.27 (0.81-1.99) |  | 1.28 (0.82-2.00)   |
| Cough in the last two weeks     |            |            |                  |  |                  |  |                    |
| No                              | 558 (64.0) | 314 (36.0) | 1                |  | 1                |  | 1                  |
| Yes                             | 75 (54.7)  | 62 (42.3)  | 0.73 (0.47-1.12) |  | 0.59 (0.38-0.92) |  | 0.65 (0.41-1.02)   |
| Community-level characteristics |            |            |                  |  |                  |  |                    |
| Residence                       |            |            |                  |  |                  |  |                    |

|                                |            |            |                  |  |  |                  |                    |
|--------------------------------|------------|------------|------------------|--|--|------------------|--------------------|
| Urban                          | 126 (77.3) | 37 (22.7)  | 1                |  |  | 1                | 1                  |
| Rural                          | 507 (60.0) | 339 (40.0) | 0.42 (0.24-0.75) |  |  | 0.42 (0.24-0.72) | 0.35 (0.14-0.88) * |
| Region                         |            |            |                  |  |  |                  |                    |
| Afar                           | 127 (50.0) | 127 (50.0) | 1                |  |  | 1                | 1                  |
| Somali                         | 182 (52.6) | 164 (47.4) | 1.11 (0.69-1.81) |  |  | 1.02 (0.65-1.59) | 1.13 (0.71-1.76)   |
| Benishangul                    | 187 (83.4) | 37 (16.6)  | 6.44 (3.54-11.7) |  |  | 5.27 (2.87-9.66) | 2.52 (1.29-4.93) * |
| Gambella                       | 137 (74.0) | 48 (26.0)  | 3.81 (2.12-6.87) |  |  | 2.87 (1.63-5.04) | 1.87 (1.03-3.38) * |
| Community-level poverty        |            |            |                  |  |  |                  |                    |
| Poorest                        | 350 (55.0) | 287 (45.0) | 1                |  |  | 1                | 1                  |
| Poorer                         | 120 (74.0) | 42 (26.0)  | 1.89 (1.19-3.00) |  |  | 1.20 (0.74-1.94) | 1.07 (0.64-1.77)   |
| Middle                         | 67 (71.3)  | 27 (28.7)  | 1.88 (1.08-3.26) |  |  | 1.15 (0.64-2.04) | 0.78 (0.35-1.73)   |
| Richer                         | 62 (83.8)  | 12 (16.2)  | 3.65 (1.77-7.52) |  |  | 2.04 (0.98-4.26) | 2.34 (0.76-7.13)   |
| Richest                        | 34 (81.0)  | 8 (19.0)   | 3.43 (1.42-8.31) |  |  | 1.95 (0.79-4.80) | 2.59 (0.67-9.93)   |
| Community-level media exposure |            |            |                  |  |  |                  |                    |
| No                             | 593 (61.8) | 366 (38.2) | 1                |  |  | 1                | 1                  |
| Yes                            | 40 (80.0)  | 10 (20.0)  | 1.89 (0.83-4.30) |  |  | 1.03 (0.44-2.36) | 1.07 (0.44-2.61)   |

319 ~~\*statistically\*~~ **Statistically** significant at p-value <0.05 at model 3

320 ANC: Antenatal Care,

321 AOR: Adjusted Odds Ratio,

322 COR: Crude Odds Ratio,

323 ICC: Intra-class Correlation Coefficient,

324 PNC: Postnatal Care

## 325 Discussion

326 The ~~overall status~~ study showed that at least one of the recommended micronutrient intake  
327 among children aged 6-23 months in the emerging regions of Ethiopia was found to be 62.7%.

328 The individual-level factors such as the age of the child, mother's occupation, and current ANC  
329 follow up have been significantly associated with the intake of micronutrients. From the  
330 community-level factors, ~~the~~ residence and region were significantly associated with  
331 micronutrient intake.

332 Micronutrient is available in foods and can also be provided through a direct supplement. In  
333 this study, we assessed the level of vitamin A and iron intake. The result showed that around  
334 28 and 15.566% of children consume foods rich in vitamin A and iron, respectively. From  
335 EDHS 2016 report, consumption of foods rich in vitamin A and iron were 38 and 22%,  
336 correspondingly, and lowest intake was observed in Afar [49], which is comparable with the  
337 current finding. ~~In addition~~ Besides, almost half of the children (47.18%) get vitamin A  
338 supplements; and as few as 6% of them get iron supplements. The previous EDHS (2011)  
339 finding showed that vitamin A supplement, in the four regions, was 43.17%, which is lower  
340 than the current ~~finding result~~ [36]. This might be due to the emphasis given by the government  
341 to achieve the first phase of the nutritional program.

342 Moreover, the national micronutrient survey (2016) revealed that the national coverage of  
343 vitamin supplements was 63% [50], which is higher than the current finding. However, the  
344 report showed that sub-clinical vitamin A deficiency was 14%. Vitamin A supplement in  
345 Nigeria was 45%,-% which is comparable with the current finding [51]. However, our study  
346 differs from the finding in India (30.4%) [52].

347 The finding showed that at least one of the ~~overall recommended~~ micronutrient intake status  
348 was 62.7%, which is lower than that of the national target of over 90% [53]. Besides, there was

Formatted: Default Paragraph Font, Font: +Body (Calibri), 11 pt, Font color: Auto

349 a considerable difference between the regions. The National Nutritional Program end-line  
350 survey report was also comparable with the current findings [54]. Benishangul and Gambella  
351 regions where agriculture, a source of legume and cereal plants, is very common, had a higher  
352 intake. However, regions of Afar and Somalia are inhabited by pastoralist people with a  
353 scattered settlement where fresh fruit and vegetables are not readily available. Besides,  
354 healthcare facilities may also be inaccessible and under-staffed. A study from the pastoral  
355 community showed that the majority source of food was dairy products [55].

356 This study identified that micronutrient intake among children whose mothers worked in  
357 agriculture was higher compared with children whose mothers did not have work. Mothers who  
358 work in agriculture might have better access to diversified agricultural products and animal  
359 products that are rich sources for vitamins and minerals. Moreover, participating in work may  
360 expose mothers with peers and friends that can serve as a source of information related to  
361 micronutrient intake and benefits. This study also showed that agrarian dominants were more  
362 likely to consume diversified food, which can be used as a proxy for adequate micronutrient  
363 density of foods [56]. Previous studies are also consistent with the current finding [36, 57].

364 The odds of micronutrient intake for children age 13-23 were higher compared to children age  
365 between 6-12 months. The possible explanation could be that the age groups have better  
366 nutritional diversity. In the EDHS 2016, for example, children over 12 months old were more  
367 likely to obtain diversified food, ~~a possible source of which implies that they can get more~~  
368 micronutrients- [56, 58], On the other way, the late introduction of complementary feeding  
369 might have resulted in consuming a limited variety of food such as only milk or cereal products.  
370 Moreover, mothers' perception of low ability of children intestine and traditional beliefs might  
371 contribute to low consumption of diversified food in those children (6-12 months). Also, even  
372 if vitamin A supplement is effective for 6-11 months, especially when used with the vaccine  
373 against measles, vitamin A supplementation can be reduced by dropping out of this age group-

Formatted: Font: Times New Roman, 12 pt, Font color: Text 1

374 and certain children (6-12 months) were not eligible to receive vitamin A supplement during  
375 the survey. Studies from Nigeria are also comparable to the current finding [51, 57].

Formatted: English (United Kingdom)

376 In this study, higher odds of micronutrient intake were observed among children whose mother  
377 had ANC follow-ups compared to those children whose mother did not have ANC follow-ups.

378 This finding was in line with these of previous studies conducted in Ethiopia [36]. ~~A~~  
379 ~~plausible~~The possible explanation might be mothers who had ANC follow-up may have a  
380 chance of getting information, education, knowledge and also counselling services on foods  
381 rich in micronutrients and ~~theirs~~ availability ~~of supplements~~ from health  
382 ~~professionals-professionals' talks~~. Furthermore, they might ~~be~~ able to learn about the value of  
383 iron ~~by taking iron intake that~~ supplements during their ANC follow-up. Moreover, a systematic  
384 review by Temesgen et al. suggests that children whose mothers have ANC follow-up have a  
385 higher probability than their counterparts to eat diversified food [59].

386 The odds of micronutrient intake among children who reside in rural communities were lower  
387 compared to their counterparts. This is supported by a systematic study in Ethiopia, which  
388 reported that urban residents had higher odds of micronutrient intake than rural residents [59].  
389 However, few studies' findings [51, 52, 60] contradict with the current study. The potential  
390 explanation might be food fortification, and supplementation focused more ~~for~~on rural than  
391 urban through community-based maternal and child health outreach programs.

392 Our finding shows that micronutrient intake among children who live in Benishangul and  
393 Gambella regions was higher compared to those who live in the Afar region. This can be  
394 explained by the fact that, compared to the two regions, the economic activities of the Afar and  
395 Somalia regions are mostly dominated by cattle breeding and pastoral lifestyles, and agriculture  
396 is common in Benishangul and Gambella. Besides, since the latter two regions have dense  
397 forests and water reservoirs, they could get wild fruit and fish, which are a good source of  
398 micronutrients. Previous studies showed that in the pastoral community, vitamin A rich foods

399 were scarce, and meat and egg consumption were low [55]. Natural forest and semi-natural  
400 forests were positively associated with a larger number of nutritionally important food groups  
401 [61]. A study from the recent EDHS (2016) showed that children of the agrarian community  
402 were more likely to consume diversified food than that of the pastoral community.

### 403 **Strength and limitations of the study**

404 The main strengths of the study are its representativeness, large sample size, and the availability  
405 of individual and community-level factors that demonstrate the actual micronutrient intake  
406 status of children in the emerging regions. Besides, this study used a multilevel-modelling  
407 technique to identify a more valid result that takes the hierarchical nature of the survey data  
408 into account. Furthermore, the DHS surveys have similar designs with similar variables in a  
409 different setting; the result may, therefore, be applied to other similar settings.

410 The study ~~attempted~~tried to assess the intake status of micronutrient using the national data and  
411 discuss this with other cross-sectional studies; focus on nutritional studies that can under or  
412 overestimates our findings. Moreover, the study used the national micronutrient  
413 recommendation for the assessment of the outcome variable which might not significantly  
414 measure the adequacy of intake. Furthermore, the mothers might have experienced recall bias,  
415 particularly regarding vitamin A supplementation and deworming for their child in the last six  
416 months prior to the survey, for instance. Compared to other studies, however, our study  
417 assessed later events that preceded the study by only six months which might decrease the  
418 recall bias.

### 419 **Conclusion**

### 420 **Conclusions**

421 In conclusion, the overall intake of micronutrients in this study was below the national  
422 recommendation. Besides, there ~~were~~was a lower intake of micronutrients in the two pastorally  
423 dominated regions (Afar and Somalia). Individual-level characteristics such as mothers'  
424 occupation and age of a child and community-level characteristics ANC for index child,  
425 residence, and region were significantly associated with the micronutrient intake status.

426 Therefore, for the improvement of micronutrient intake, the regional and zonal health  
427 departments and the health facilities needs to cooperate with state governments across the  
428 regions, continuously increase the amount of vitamin A and the iron supplementation,  
429 encourage the use of Vitamin A and iron-rich foods, and reinforce community-based outreach  
430 programs for maternal health and child health programs.

### 431 **List of Abbreviations**

432 ANC: Antenatal Care, AOR: Adjusted Odds Ratio, CI: Confidence Interval, COR: Crude Odds  
433 Ratio, CSA: Central Statistical Agency, EA: Enumeration Areas, EDHS: Ethiopian  
434 Demographic and Health Survey, FAO: Food and Agriculture Organizations, FMOH: Federal  
435 Ministry of Health, ICC: Intra-class Correlation Coefficients, MN: Micronutrients, PNC:  
436 Postnatal Care, and WHO: World Health Organization

### 437 **Acknowledgments**

438 We are very thankful to MEASURE DHS for permission to use the EDHS 2016 survey data  
439 sets.

### 440 **References**

441 1. Von Grebmer K, Saltzman A, Birol E, Wiesman D, Prasai N, Yin S, et al. Synopsis:  
442 2014 Global Hunger Index: The Challenge of Hidden Hunger: Intl Food Policy Res Inst; 2014.

- 443 2. Tzioumis E, Kay MC, Bentley ME, Adair LS. Prevalence and trends in the childhood  
444 dual burden of malnutrition in low-and middle-income countries, 1990–2012. *Public health  
445 nutrition*. 2016;19(8):1375-88.
- 446 3. Harika R, Faber M, Samuel F, Kimiywe J, Mulugeta A, Eilander A. Micronutrient  
447 status and dietary intake of iron, vitamin A, iodine, folate and zinc in women of reproductive  
448 age and pregnant women in Ethiopia, Kenya, Nigeria and South Africa: a systematic review of  
449 data from 2005 to 2015. *Nutrients*. 2017;9(10):1096.
- 450 4. Azadbakht L, Esmaillzadeh A. Macro and Micro-Nutrients Intake, Food Groups  
451 Consumption and Dietary Habits among Female Students in Isfahan University of Medical  
452 Sciences. *Iranian Red Crescent medical journal*. 2012;14(4):204-9. Epub 2012/07/04. PubMed  
453 PMID: 22754682; PubMed Central PMCID: PMC3385798.
- 454 5. Bush LA, Hutchinson J, Hooson J, Warthon-Medina M, Hancock N, Greathead K, et  
455 al. Measuring energy, macro and micronutrient intake in UK children and adolescents: a  
456 comparison of validated dietary assessment tools. *BMC Nutrition*. 2019;5(1):53. doi:  
457 10.1186/s40795-019-0312-9.
- 458 6. Herrador Z, Sordo L, Gadisa E, Buño A, Gómez-Rioja R, Iturzaeta JM, et al.  
459 Micronutrient deficiencies and related factors in school-aged children in Ethiopia: a cross-  
460 sectional study in Libo Kemkem and Fogera districts, Amhara Regional State. *PLoS One*.  
461 2014;9(12):e112858. Epub 2014/12/30. doi: 10.1371/journal.pone.0112858. PubMed PMID:  
462 25546056; PubMed Central PMCID: PMC4278675.
- 463 7. Sharma P, Dwivedi S, Singh D. Global poverty, hunger, and malnutrition: a situational  
464 analysis. *Biofortification of food crops*: Springer; 2016. p. 19-30.
- 465 8. Tariku A, Bikis GA, Woldie H, Wassie MM, Worku AG. Child wasting is a severe  
466 public health problem in the predominantly rural population of Ethiopia: A community based  
467 cross-sectional study. *Archives of Public Health*. 2017;75(1):26.



- 468 9. Bharaniidharan J, Reshmi S. Review on Malnutrition: Impact and Prevention.  
469 International Journal. 2019;7(3):240-3.
- 470 10. Ritchie H, Roser M. Micronutrient deficiency. Our World in data. 2017.
- 471 11. Ames BN. Low micronutrient intake may accelerate the degenerative diseases of aging  
472 through allocation of scarce micronutrients by triage. Proceedings of the National Academy of  
473 Sciences of the United States of America. 2006;103(47):17589-94. Epub 2006/11/15. doi:  
474 10.1073/pnas.0608757103. PubMed PMID: 17101959.
- 475 12. Schneider J, Fumeaux CJF, Duerden EG, Guo T, Foong J, Graz MB, et al. Nutrient  
476 intake in the first two weeks of life and brain growth in preterm neonates. Pediatrics.  
477 2018;141(3):e20172169.
- 478 13. Velasco I, Bath SC, Rayman MP. Iodine as essential nutrient during the first 1000 days  
479 of life. Nutrients. 2018;10(3):290.
- 480 14. Keeley B, Little C, Zuehlke E. The State of the World's Children 2019: Children, Food  
481 and Nutrition--Growing Well in a Changing World. UNICEF. 2019.
- 482 15. Ahmed F, Prendiville N, Narayan A. Micronutrient deficiencies among children and  
483 women in Bangladesh: progress and challenges. Journal of nutritional science. 2016;5:e46.  
484 Epub 2017/06/18. doi: 10.1017/jns.2016.39. PubMed PMID: 28620473; PubMed Central  
485 PMCID: PMC5465809.
- 486 16. Nunn RL, Kehoe SH, Chopra H, Sahariah SA, Gandhi M, Di Gravio C, et al. Dietary  
487 micronutrient intakes among women of reproductive age in Mumbai slums. European journal  
488 of clinical nutrition. 2019;73(11):1536-45. doi: 10.1038/s41430-019-0429-6.
- 489 17. Kennedy GL, Pedro MR, Seghieri C, Nantel G, Brouwer I. Dietary Diversity Score Is  
490 a Useful Indicator of Micronutrient Intake in Non-Breast-Feeding Filipino Children. The  
491 Journal of nutrition. 2007;137(2):472-7. doi: 10.1093/jn/137.2.472.

- 492 18. Newmann SJ, Mishra K, Onono M, Bukusi EA, Cohen CR, Gage O, et al. Providers'  
493 Perspectives on Provision of Family Planning to HIV-Positive Individuals in HIV Care in  
494 Nyanza Province, Kenya. *AIDS Res Treat.* 2013;2013:915923. doi: 10.1155/2013/915923.  
495 PubMed PMID: 23738058; PubMed Central PMCID: PMC3659431.
- 496 19. Lander RL, Enkhjargal T, Batjargal J, Bailey KB, Diouf S, Green TJ, et al. Multiple  
497 micronutrient deficiencies persist during early childhood in Mongolia. *Asia Pacific journal of*  
498 *clinical nutrition.* 2008;17(3):429-40. Epub 2008/09/27. PubMed PMID: 18818163.
- 499 20. Sheehy T, Carey E, Sharma S, Biadgilign S. Trends in energy and nutrient supply in  
500 Ethiopia: a perspective from FAO food balance sheets. *Nutrition journal.* 2019;18(1):46. doi:  
501 10.1186/s12937-019-0471-1.
- 502 21. Central Statistical Agency Addis Ababa E. Ethiopia Demographic and Health Survey  
503 2016 Addis Ababa, Ethiopia 2016.
- 504 22. Dangura D, Gebremedhin S. Dietary diversity and associated factors among children  
505 6-23 months of age in Gorche district, Southern Ethiopia: Cross-sectional study. *BMC*  
506 *pediatrics.* 2017;17(1):6.
- 507 23. Birhanu M, Abegaz T, Fikre R. Magnitude and Factors Associated with Optimal  
508 Complementary Feeding Practices among Children Aged 6-23 Months in Bensa District,  
509 Sidama Zone, South Ethiopia. *Ethiopian journal of health sciences.* 2019;29(2).
- 510 24. Forsido SF, Kiyak N, Belachew T, Hensel O. Complementary feeding practices, dietary  
511 diversity, and nutrient composition of complementary foods of children 6–24 months old in  
512 Jimma Zone, Southwest Ethiopia. *Journal of Health, Population and Nutrition.* 2019;38(1):14.
- 513 25. Mulat E, Alem G, Woyraw W, Temesgen H. Uptake of minimum acceptable diet  
514 among children aged 6–23 months in orthodox religion followers during fasting season in rural  
515 area, DEMBECHA, north West Ethiopia. *BMC Nutrition.* 2019;5(1):18.

- 516 26. Sagaro GG AM. Dietary Diversity and Associated Factors Among Infants and Young  
517 Children in Wolaita Zone, Southern Ethiopia. *Science Journal of Clinical Medicine*. July  
518 2017;6, (4,): 53-9.
- 519 27. Belay A, Joy EJ, Chagumaira C, Zerfu D, Ander EL, Young SD, et al. Selenium  
520 Deficiency Is Widespread and Spatially Dependent in Ethiopia. *Nutrients*. 2020;12(6):1565.
- 521 28. Herrador Z, Sordo L, Gadisa E, Buño A, Gómez-Rioja R, Iturzaeta J, et al.  
522 Micronutrient Deficiencies and Related Factors in School-Aged Children in Ethiopia: A Cross-  
523 Sectional Study in Libo Kemkem and Fogera Districts, Amhara Regional State. *PloS one*.  
524 2014;9:e112858. doi: 10.1371/journal.pone.0112858.
- 525 29. Shivakoti R, Christian P, Yang WT, Gupte N, Mwelase N, Kanyama C, et al.  
526 Prevalence and risk factors of micronutrient deficiencies pre- and post-antiretroviral therapy  
527 (ART) among a diverse multicountry cohort of HIV-infected adults. *Clinical nutrition*.  
528 2016;35(1):183-9. Epub 2015/02/24. doi: 10.1016/j.clnu.2015.02.002. PubMed PMID:  
529 25703452; PubMed Central PMCID: PMC4531105.
- 530 30. Serra-Majem L, Ribas L, Pérez-Rodrigo C, García-Closas R, Peña-Quintana L,  
531 Aranceta J. Determinants of nutrient intake among children and adolescents: results from the  
532 enKid Study. *Annals of Nutrition and Metabolism*. 2002;46(Suppl. 1):31-8.
- 533 31. Cheng Y, Dibley MJ, Zhang X, Zeng L, Yan H. Assessment of dietary intake among  
534 pregnant women in a rural area of western China. *BMC Public Health*. 2009;9(1):222. doi:  
535 10.1186/1471-2458-9-222.
- 536 32. Cetin I, Bühling K, Demir C, Kortam A, Prescott SL, Yamashiro Y, et al. Impact of  
537 Micronutrient Status during Pregnancy on Early Nutrition Programming. *Annals of Nutrition  
538 and Metabolism*. 2019;74(4):269-78. doi: 10.1159/000499698.
- 539 33. Birhanu M, Abegaz T, Fikre R. Magnitude and Factors Associated with Optimal  
540 Complementary Feeding Practices among Children Aged 6-23 Months in Bensa District,

541 Sidama Zone, South Ethiopia. *Ethiop J Health Sci.* 2019;29(2):153-64. Epub 2019/04/24. doi:  
542 10.4314/ejhs.v29i2.2. PubMed PMID: 31011263; PubMed Central PMCID:  
543 PMC6460456.

544 34. Iannotti L. Dietary Intakes and Micronutrient Adequacy Related to the Changing  
545 Livelihoods of Two Pastoralist Communities in Samburu, Kenya. *Current Anthropology.*  
546 2014;55:475-82. doi: 10.1086/677107.

547 35. Bach A, Gregor E, Sridhar S, Fekadu H, Fawzi W. Multisectoral Integration of  
548 Nutrition, Health, and Agriculture: Implementation Lessons From Ethiopia. *Food and nutrition*  
549 *bulletin.* 2020:0379572119895097.

550 36. Haile D, Biadgilign S, Azage M. Differentials in vitamin A supplementation among  
551 preschool-aged children in Ethiopia: evidence from the 2011 Ethiopian Demographic and  
552 Health Survey. *Public health.* 2015;129(6):748-54.

553 37. Gebre-Egziabhere T. Emerging Regions in Ethiopia: Are they catching up with the rest  
554 of Ethiopia? *Eastern Africa Social Science Research Review.* 2018;34(1):1-36.

555 38. Stark J, Terasawa K, Ejigu M. Climate change and conflict in pastoralist regions of  
556 Ethiopia: mounting challenges, emerging responses. *Conflict Management and Mitigation*  
557 *(CMM) Discussion Paper.* 2011;(4).

558 39. Central Statistical Agency (CSA) [Ethiopia] and ICF. Ethiopia Demographic and  
559 Health Survey 2016. Addis Ababa, Ethiopia, and Rockville, Maryland, USA: CSA and ICF.  
560 2016. <https://dhsprogram.com>. 2016.

561 40. WHO. Use of multiple micronutrient powders for point- of- use fortification of foods  
562 consumed by infants and young children aged 6–23 months and children aged 2–12 years  
563 guideline2016. 60.  
564 [https://www.who.int/nutrition/publications/micronutrients/guidelines/mmpowders-  
infant6to23mons-children2to12yrs/en/](https://www.who.int/nutrition/publications/micronutrients/guidelines/mmpowders-<br/>565 infant6to23mons-children2to12yrs/en/) p.

- 566 41. Dary O, Hurrell R. Guidelines on food fortification with micronutrients. World Health  
567 Organization, Food and Agricultural Organization of the United Nations: Geneva, Switzerland.  
568 2006.
- 569 42. FAO, WHO. Human vitamin and mineral requirements. Report of a joint FAO/WHO  
570 expert consultation, Bangkok, Thailand. Food and Nutrition Division, FAO, Rome. 2001:235-  
571 47.
- 572 43. WHO. Protein and amino acid requirements in human nutrition: report of a joint  
573 FAO/WHO/UNU expert consultation. Geneva; 2007. WHO Technical Report Series. 935.
- 574 44. Organization WH. WHO guideline: use of multiple micronutrient powders for point-  
575 of-use fortification of foods consumed by infants and young children aged 6–23 months and  
576 children aged 2–12 years: World Health Organization; 2016. 60 p.
- 577 45. Russell R, Beard JL, Cousins RJ, Dunn JT, Ferland G, Hambidge K, et al. Dietary  
578 reference intakes for vitamin A, vitamin K, arsenic, boron, chromium, copper, iodine, iron,  
579 manganese, molybdenum, nickel, silicon, vanadium, and zinc. A Report of the Panel on  
580 Micronutrients, Subcommittees on Upper Reference Levels of Nutrients and of Interpretation  
581 and Uses of Dietary Reference Intakes, and the Standing Committee on the Scientific  
582 Evaluation of Dietary Reference Intakes Food and Nutrition Board Institute of Medicine. 2001.
- 583 46. Tabacchi G, Wijnhoven TM, Branca F, Roman-Vinas B, Ribas-Barba L, Ngo J, et al.  
584 How is the adequacy of micronutrient intake assessed across Europe? A systematic literature  
585 review. The British journal of nutrition. 2009;101 Suppl 2:S29-36. Epub 2009/07/15. doi:  
586 10.1017/s0007114509990560. PubMed PMID: 19594962.
- 587 47. Croft TN, Aileen M. J. Marshall, Courtney K. Allen, et al.. Guide to DHS Statistics.  
588 Rockville, Maryland, USA: ICF. 2018.
- 589 48. Hox JJ, Moerbeek M, Van de Schoot R. Multilevel analysis: Techniques and  
590 applications. Third ed: Routledge; 2010. 364. <https://b-ok.cc/book/3695027/0a101f> p.

- 591 49. Central Statistical Agency (CSA) [Ethiopia] and ICF. 2016. Ethiopia Demographic and  
592 Health Survey 2016 2016. Addis Ababa, Ethiopia, and Rockville, Maryland, USA: CSA and  
593 ICF, ].
- 594 50. The Ethiopian Public Health Institute. Ethiopian National Micronutrient Survey Report  
595 2016. Available from:  
596 [https://www.ephi.gov.et/images/pictures/download2009/National\\_MNS\\_report.pdf](https://www.ephi.gov.et/images/pictures/download2009/National_MNS_report.pdf).
- 597 51. Aghaji AE, Duke R, Aghaji UC. Inequitable coverage of vitamin A supplementation in  
598 Nigeria and implications for childhood blindness. BMC public health. 2019;19(1):282.
- 599 52. Agrawal S, Agrawal P. Vitamin A supplementation among children in India: Does their  
600 socioeconomic status and the economic and social development status of their state of residence  
601 make a difference? International journal of medicine and public health. 2013;3(1):48.
- 602 53. The Federal Democratic Republic of Ethiopia. National Nutrition Programme: June  
603 2013–June 2015, MOH, Addis Ababa, Ethiopia 2012. Available from:  
604 [https://extranet.who.int/nutrition/gina/sites/default/files/ETH%202013%20National%20Nutri  
605 tion%20Programme.pdf](https://extranet.who.int/nutrition/gina/sites/default/files/ETH%202013%20National%20Nutrition%20Programme.pdf).
- 606 54. Ayana G, Hailu A, Tessema M, Belay A, Zerfu D, Bekele T, et al. Ethiopian National  
607 Nutrition Program End-Line Survey 2015.
- 608 55. Mengistu G, Moges T, Samuel A, Baye K. Energy and nutrient intake of infants and  
609 young children in pastoralist communities of Ethiopia. Nutrition. 2017;41:1-6.
- 610 56. Tassew AA, Tekle DY, Belachew AB, Adhena BM. Factors affecting feeding 6–23  
611 months age children according to minimum acceptable diet in Ethiopia: A multilevel analysis  
612 of the Ethiopian Demographic Health Survey. PloS one. 2019;14(2).
- 613 57. Aremu O, Lawoko S, Dalal K. Childhood vitamin A capsule supplementation coverage  
614 in Nigeria: a multilevel analysis of geographic and socioeconomic inequities. The Scientific  
615 World Journal. 2010;10:1901-14.

- 616 58. Aemro M, Mesele M, Birhanu Z, Atenafu A. Dietary diversity and meal frequency  
617 practices among infant and young children aged 6–23 months in Ethiopia: a secondary analysis  
618 of Ethiopian demographic and health survey 2011. *Journal of nutrition and metabolism*.  
619 2013;2013.
- 620 59. Temesgen H, Negesse A, Woyraw W, Mekonnen N. Dietary diversity feeding practice  
621 and its associated factors among children age 6–23 months in Ethiopia from 2011 up to 2018:  
622 a systematic review and meta-analysis. *Italian journal of pediatrics*. 2018;44(1):1-10.
- 623 60. Immurana M, Arabi U. Socio-economic covariates of micronutrients supplementation  
624 and deworming among children in Ghana. *J Behav Health*. 2016;4:154-61.
- 625 61. Ickowitz A, Rowland D, Powell B, Salim MA, Sunderland T. Forests, trees, and  
626 micronutrient-rich food consumption in Indonesia. *PloS one*. 2016;11(5):

627 [1](#).

628

629 **Supporting information files**

630 ~~Data file “STATA Data\_Micronutrient intake status among children aged 6-23 months\_EDHS 2016”~~

**Formatted:** Font: 12 pt
